# Supplementary material for: A scoping review of rapid review methods
Source: BMC Med. 2015 Sep 16;13:224. doi: 10.1186/s12916-015-0465-6 (PMC4574114; doi:10.1186/s12916-015-0465-6)
Supplement: Additional file 1: — Includes five appendices with supplementary data. (PDF 603 kb) [file 12916_2015_465_MOESM1_ESM.pdf]

## **Table of Contents**

|                                                                       |    |
|-----------------------------------------------------------------------|----|
| Appendix 1: MEDLINE Literature Search .....                           | 2  |
| Appendix 2: Framework of Rapid Review Methods .....                   | 4  |
| Appendix 3: Study Characteristics.....                                | 6  |
| Appendix 4: Terminology, definition, and rapid review citations ..... | 17 |
| Appendix 5: Rapid review methods details .....                        | 27 |

## Appendix 1: MEDLINE Literature Search

Search Strategy:

---

- 1 (abbreviated adj review?).tw.
- 2 (abbreviated adj synthes?s).tw.
- 3 (accelerated adj2 review?).tw.
- 4 (accelerated adj2 synthes?s).tw.
- 5 (brief adj synthes?s).tw.
- 6 (expedited adj2 review?).tw.
- 7 (expedited adj2 synthes?s).tw.
- 8 (meta adj method\$).tw.
- 9 (meta adj evaluat\$).tw.
- 10 (rapid adj2 review?).tw.
- 11 (rapid adj2 assess\$).tw.
- 12 "rapid health technology assess\$".tw.
- 13 (rapid adj HTA?).tw.
- 14 (rapid adj approach\$).tw.
- 15 (rapid adj search\$).tw.
- 16 (rapid adj2 synthes?s).tw. not (ch or cs).fs.
- 17 (realis\$ adj approach\$).tw.
- 18 (realis\$ adj evaluat\$).tw.
- 19 (realis\$ adj synthes?s).tw.
- 20 (speed\$ adj2 review?).tw.
- 21 (streamline\$ adj2 review?).tw.

22 (streamline\$ adj2 syntheses?).tw.  
23 (stream-line\$ adj2 review?).tw.  
24 (stream-line\$ adj2 syntheses?).tw.  
25 (fast\$ adj2 review?).tw.  
26 (fast\$ adj2 syntheses?).tw.  
27 or/1-26  
28 exp Animals/ not (exp Animals/ and Humans/)  
29 27 not 28  
30 29 and ("2008\$" or "2009\$" or "2010\$" or "2011\$" or "2012\$" or "2013\$").ed.

## Appendix 2: Framework of Rapid Review Methods

| Rapid Review Steps                   |                    |                                                                                                                                                     | Coding Scheme                                                                                                                                                                                                                            |
|--------------------------------------|--------------------|-----------------------------------------------------------------------------------------------------------------------------------------------------|------------------------------------------------------------------------------------------------------------------------------------------------------------------------------------------------------------------------------------------|
| General                              | Duration of Review | > 6 months<br>≤ 6 months<br>Not reported                                                                                                            | <b>SR method:</b> > 6 months<br><b>Streamlined:</b> ≤ 6 months                                                                                                                                                                           |
|                                      | Published protocol | Yes<br>No<br>Not reported                                                                                                                           | <b>SR method:</b> protocol mentioned<br><b>Streamlined:</b> protocol not mentioned                                                                                                                                                       |
| Literature Search                    | Databases Searched | Searched more than one database<br>Searched one database only<br>Used a previous review(s) as starting point<br>Not reported                        | <b>SR method:</b> at minimum, searched more than one database and searched grey literature<br><b>Partially streamlined:</b> either searched one database only / Used a previous review(s) as starting point and searched grey literature |
|                                      | Grey literature    | Searched grey literature<br>No grey literature search<br>Not reported                                                                               | <b>Fully streamlined:</b> database search not reported, grey lit search not reported, no grey literature search                                                                                                                          |
| Limits applied                       | Date               | No limit<br>Limited by date<br>Not reported                                                                                                         | <b>SR method:</b> no limit/ not reported<br><b>Partially streamlined:</b> either date or language limited                                                                                                                                |
|                                      | Language           | No limit<br>Limited by language<br>Not reported                                                                                                     | <b>Fully streamlined:</b> both date and language limited                                                                                                                                                                                 |
| Screening                            | Title & abstracts  | ≥ 2 independent reviewers<br>One reviewer and one verifier<br>One reviewer only<br>Done but unclear number of reviewers<br>Not done<br>Not reported | <b>SR method:</b> both L1 and L2 screening had two independent reviewers<br><b>Partially streamlined:</b> either L1 and L2 had one reviewer and one verifier<br><b>Fully streamlined:</b> not done/ not reported, done but unclear       |
|                                      | Full-texts         | ≥ 2 independent reviewers<br>One reviewer and one verifier<br>One reviewer only<br>Done but unclear number of reviewers<br>Not done<br>Not reported |                                                                                                                                                                                                                                          |
| Data Abstraction & Quality Appraisal | Data abstraction   | ≥ 2 independent reviewers<br>One reviewer and one verifier<br>One reviewer only<br>Done but unclear number of reviewers<br>Not done<br>Not reported | <b>SR method:</b> two independent reviewers<br><b>Partially streamlined:</b> one reviewer and one verifier<br><b>Fully streamlined:</b> one reviewer only, done but unclear number of reviewers, not done, not reported                  |
|                                      | Quality appraisal  | ≥ 2 independent reviewers<br>One reviewer and one verifier<br>One reviewer only<br>Done but unclear number of reviewers<br>Not done<br>Not reported | <b>SR method:</b> two independent reviewers<br><b>Partially streamlined:</b> one reviewer and one verifier/ one reviewer only/ done but unclear number of reviewers<br><b>Fully streamlined:</b> not done/ not reported                  |

|                       |                                                                                                                                                                                               |                                                                                                                                                                                                                            |
|-----------------------|-----------------------------------------------------------------------------------------------------------------------------------------------------------------------------------------------|----------------------------------------------------------------------------------------------------------------------------------------------------------------------------------------------------------------------------|
| <b>Data Synthesis</b> | <b>Data synthesis</b><br>Meta-analysis and narrative summary<br>Meta-analysis/pooling only<br>Clear reasons for not doing meta-analysis<br>Narrative/descriptive summary only<br>Not reported | <b>MA/clear reasons:</b> meta-analysis and narrative summary/ clear reasons for not doing meta-analysis<br><b>Descriptive:</b> narrative/descriptive summary only/ unclear or limited data synthesis methods/ not reported |
|-----------------------|-----------------------------------------------------------------------------------------------------------------------------------------------------------------------------------------------|----------------------------------------------------------------------------------------------------------------------------------------------------------------------------------------------------------------------------|

### Appendix 3: Study Characteristics

| Author, Year                                                                              | Type of Source (Report or Journal) | Country       | Name of synthesis method                           | Type of review (application only) | Article Type | Duration of Review | Full Methods Reported | Published protocol    | Review question                    |
|-------------------------------------------------------------------------------------------|------------------------------------|---------------|----------------------------------------------------|-----------------------------------|--------------|--------------------|-----------------------|-----------------------|------------------------------------|
| Abrami, 2010                                                                              | Journal                            | Canada        | Brief Review                                       | NA                                | Development  | 6 months           | Yes                   | Protocol not reported | Research question clearly reported |
| Adi, 2004                                                                                 | Report                             | UK            | Rapid Systematic Reviews                           | Interventions                     | Application  | 3-6 months         | Yes                   | Protocol not reported | Research question clearly reported |
| Armitage, 2009                                                                            | Journal                            | UK            | Rapid Structured Literature Review                 | Interventions                     | Application  | NR                 | Yes                   | Protocol not reported | Research question clearly reported |
| Atree, 2008                                                                               | Journal                            | UK            | Rapid Review                                       | Interventions                     | Application  | 12 months          | Yes                   | Protocol not reported | Research question clearly reported |
| Australian Safety and Efficacy Register of New Interventional Procedures – Surgical, 2009 | Report                             | Australia     | Brief Review                                       | Interventions                     | Application  | NR                 | Yes                   | Protocol not reported | Research question clearly reported |
| Bambra, 2010                                                                              | Journal                            | UK            | Rapid (non-systematic) Narrative Literature Review | Interventions                     | Application  | 6 months           | Yes                   | Protocol not reported | Research question clearly reported |
| Barnighausen, 2012                                                                        | Journal                            | South Africa, | Rapid Review                                       | Interventions                     | Application  | NR                 | Yes                   | Protocol not reported | Research question                  |

|                                                                          |         |                    |                                                               |               |             |          |     |                          |                                              |
|--------------------------------------------------------------------------|---------|--------------------|---------------------------------------------------------------|---------------|-------------|----------|-----|--------------------------|----------------------------------------------|
|                                                                          |         | USA,<br>France, UK |                                                               |               |             |          |     |                          | clearly<br>reported                          |
| Batten, 2012                                                             | Journal | US                 | Rapid<br>Evidence<br>Assessment                               | NA            | Development | 6 months | Yes | Protocol not<br>reported | Research<br>question<br>clearly<br>reported  |
| Beck, 2012                                                               | Report  | UK                 | Rapid<br>Systematic<br>Review of<br>Evidence                  | Interventions | Application | NR       | Yes | Protocol not<br>reported | Research<br>question<br>clearly<br>reported  |
| Best, 1997                                                               | Journal | UK                 | Rapid and<br>Responsive<br>Health<br>Technology<br>Assessment | NA            | Development | 2 months | Yes | Protocol not<br>reported | Research<br>question<br>unclear/in<br>ferred |
| Best, 2012                                                               | Journal | Canada             | Rapid Realist<br>Review                                       | Frequency     | Application | 6 months | Yes | Protocol not<br>reported | Research<br>question<br>clearly<br>reported  |
| Birmingham<br>and Black<br>County<br>Strategic Health<br>Authority, 2008 | Report  | UK                 | Rapid<br>Review                                               | Interventions | Application | NR       | Yes | Protocol not<br>reported | Research<br>question<br>clearly<br>reported  |
| Blank, 2012                                                              | Journal | UK                 | Rapid<br>Evidence<br>Assessment                               | Frequency     | Application | NR       | Yes | Protocol not<br>reported | Research<br>question<br>clearly<br>reported  |
| Boycott, 2012                                                            | Journal | UK                 | Rapid<br>Evidence<br>Assessment                               | Interventions | Application | NR       | Yes | Protocol not<br>reported | Research<br>question<br>clearly<br>reported  |
| Brearley, 2011                                                           | Journal | UK                 | Rapid<br>Review and<br>Synthesis of<br>the Literature         | Experience    | Application | NR       | Yes | Protocol not<br>reported | Research<br>question<br>clearly<br>reported  |
| Brown, 2008                                                              | Report  | Canada             | Health<br>Technology<br>Assessment                            | Interventions | Application | NR       | Yes | Protocol not<br>reported | Research<br>question<br>clearly              |

|                               |         |           |                                         |               |             |           |     |                       |                                    |
|-------------------------------|---------|-----------|-----------------------------------------|---------------|-------------|-----------|-----|-----------------------|------------------------------------|
|                               |         |           | Rapid Review                            |               |             |           |     |                       | reported                           |
| Brunton, 2013                 | Report  | UK        | Systematic Rapid Evidence Review (SREA) | Interventions | Application | 9 weeks   | Yes | Protocol not reported | Research question clearly reported |
| Bryant, 2006                  | Journal | UK        | Rapid Literature Review                 | Frequency     | Application | NR        | Yes | Protocol not reported | Research question clearly reported |
| Bullock, 2010                 | Journal | USA       | Expedited Systematic Review             | Interventions | Application | NR        | Yes | Protocol not reported | Research question clearly reported |
| Bungay, 2013                  | Journal | UK        | Rapid Review                            | Interventions | Application | NR        | Yes | Protocol not reported | Research question clearly reported |
| Burls, 2002                   | Journal | UK        | Rapid Review                            | Interventions | Application | 4-6 weeks | Yes | Protocol not reported | Research question clearly reported |
| Butler, 2004                  | Report  | UK        | Rapid Evidence Assessment               | Interventions | Application | 3 months  | Yes | Protocol not reported | Research question clearly reported |
| Butt, 2010                    | Journal | UK        | Rapid Systematic Review                 | Association   | Application | NR        | Yes | Protocol not reported | Research question clearly reported |
| Caird, 2012                   | Report  | UK        | Systematic Rapid Evidence Review (SREA) | Diagnosis     | Application | NR        | Yes | Protocol not reported | Research question clearly reported |
| Cameron, 2007 [CR: Watt 2008] | Report  | Australia | Rapid Review                            | NA            | Comparison  | < 1 month | Yes | Protocol not reported | Research question clearly          |

|                      |                     |                                 |                                           |               |             |          |     |                         |                                    |
|----------------------|---------------------|---------------------------------|-------------------------------------------|---------------|-------------|----------|-----|-------------------------|------------------------------------|
|                      |                     |                                 |                                           |               |             |          |     |                         | reported                           |
| Carr, 2011           | Report              | UK, New Zealand, India, Ireland | Rapid Evidence Assessment project         | Interventions | Application | NR       | Yes | Yes, published protocol | Research question clearly reported |
| Casadesus, 2009      | Journal             | Cuba                            | Rapid Review                              | Interventions | Application | NR       | No  | Protocol not reported   | Research question unclear/inferred |
| Clark, 2003          | Report              | UK                              | Health Technology Assessment/Rapid Review | Interventions | Application | 3 months | Yes | Protocol not reported   | Research question clearly reported |
| Coomber, 2004        | Report              | UK                              | Rapid Interim Review                      | Interventions | Application | NR       | Yes | Protocol not reported   | Research question clearly reported |
| Corabian, 2002       | Conference abstract | NR                              | Technotes                                 | NA            | Comparison  | NR       | No  | Protocol not reported   | NR                                 |
| Cragg, 2008          | Report              | UK                              | Rapid Evidence Review and Appraisal       | Association   | Application | 4 months | Yes | Protocol not reported   | Research question clearly reported |
| Cummins, 2001        | Report              | UK                              | Rapid Review                              | Interventions | Application | NR       | Yes | Protocol not reported   | Research question clearly reported |
| Curson, 2010         | Journal             | UK                              | Rapid Review                              | Frequency     | Application | 3 months | No  | NA                      | NA                                 |
| De Alwis KLNSK, 2010 | Journal             | Australia                       | Rapid Evidence-based Literature Review    | Interventions | Application | NR       | No  | NA                      | NA                                 |
| De Laet, 2008        | Report              | Belgium                         | Rapid Assessment                          | Interventions | Application | NR       | Yes | Protocol not reported   | Research question clearly reported |
| Dixon-Woods,         | Journal             | UK                              | Literature                                | Frequency     | Application | NR       | Yes | Protocol not            | Research                           |

|                                 |         |                   |                                                                   |               |             |            |     |                       |                                    |
|---------------------------------|---------|-------------------|-------------------------------------------------------------------|---------------|-------------|------------|-----|-----------------------|------------------------------------|
| 2012                            |         |                   | Review                                                            |               |             |            |     | reported              | question clearly reported          |
| Doran, 2013                     | Report  | Australia         | Rapid Review (Evidence Check Review)                              | Interventions | Application | NR         | Yes | Protocol not reported | Research question clearly reported |
| Fitzpatrick-Lewis, 2011         | Journal | Canada            | Rapid Systematic Review                                           | Interventions | Application | NR         | Yes | No protocol published | Research question clearly reported |
| Foerster, 2007                  | Report  | Canada            | Health Technology Assessment/Rapid Review                         | Interventions | Application | NR         | Yes | Protocol not reported | Research question clearly reported |
| Government Social Research 2007 | Report  | UK                | Rapid Evidence Assessments                                        | NA            | Development | 8-12 weeks | Yes | Protocol not reported | Research question clearly reported |
| Geddes, 2011                    | Journal | UK                | Rapid Review                                                      | Interventions | Application | NR         | Yes | Protocol not reported | Research question clearly reported |
| Hailey, 2000                    | Journal | Australia         | Rapid Health Technology Assessment (locally known as “Technotes”) | NA            | Evaluation  | NR         | Yes | Protocol not reported | Research question clearly reported |
| Hailey, 2006                    | Journal | Canada, Australia | Health Technology Assessment                                      | NA            | Evaluation  | NR         | Yes | NA                    | NA                                 |
| Hailey, 2009                    | Journal | Canada            | Rapid Health Technology Assessments                               | NA            | Evaluation  | 1-6 months | Yes | NA                    | NA                                 |
| Hildon, 2012                    | Journal | UK                | Rapid Review                                                      | Frequency     | Application | NR         | Yes | Protocol not reported | Research question clearly          |

|                   |         |                 |                                      |               |             |           |     |                       |                                    |
|-------------------|---------|-----------------|--------------------------------------|---------------|-------------|-----------|-----|-----------------------|------------------------------------|
|                   |         |                 |                                      |               |             |           |     |                       | reported                           |
| Hulstaert, 2009   | Report  | Belgium         | Rapid Assessment                     | Interventions | Application | NR        | Yes | Protocol not reported | Research question clearly reported |
| Jahangirian, 2011 | Journal | UK              | Rapid Review                         | NA            | Development | NR        | Yes | Protocol not reported | Research question clearly reported |
| Joliffe, 2007     | Report  | UK              | Rapid Evidence Assessment            | Interventions | Application | NR        | Yes | Protocol not reported | Research question clearly reported |
| Kelly, 2011       | Journal | Australia       | Rapid Review                         | Interventions | Application | NR        | Yes | Protocol not reported | Research question clearly reported |
| Khangura, 2012    | Journal | Canada          | Evidence Summaries                   | NA            | Development | 16 months | Yes | Protocol not reported | NA                                 |
| Konnyu, 2012      | Journal | Canada          | Rapid Review                         | Interventions | Application | 1 month   | Yes | Protocol not reported | Research question clearly reported |
| Legrand, 2008     | Report  | Belgium         | Rapid Assessment                     | Interventions | Application | NR        | Yes | Protocol not reported | Research question clearly reported |
| Lewis, 2001       | Journal | UK              | Rapid and Systematic Review          | Interventions | Application | NR        | Yes | Protocol not reported | Research question clearly reported |
| Low, 2006         | Report  | Switzerland, UK | Rapid Review                         | Screening     | Application | NR        | Yes | Protocol not reported | Research question clearly reported |
| Maddern, [NR]     | Report  | Australia       | Rapid Review/Rapid Systematic Review | Interventions | Application | NR        | Yes | Protocol not reported | Research question clearly reported |

|                                    |         |                 |                                        |               |             |    |     |                       |                                    |
|------------------------------------|---------|-----------------|----------------------------------------|---------------|-------------|----|-----|-----------------------|------------------------------------|
| Maddern, [NR]                      | Report  | Australia       | Rapid Systematic Review                | Diagnosis     | Application | NR | Yes | Protocol not reported | Research question clearly reported |
| Maddern, [NR]                      | Report  | Australia       | Rapid Systematic Review                | Interventions | Application | NR | Yes | Protocol not reported | Research question clearly reported |
| Maddern, [NR]                      | Report  | Australia       | Rapid Systematic Review                | Interventions | Application | NR | Yes | Protocol not reported | Research question clearly reported |
| Maddern, 2008                      | Report  | Australia       | Rapid Systematic Review                | Interventions | Application | NR | Yes | Protocol not reported | Research question clearly reported |
| Mann, 2011                         | Journal | UK              | Rapid Review                           | Diagnosis     | Application | NR | Yes | Protocol not reported | Research question clearly reported |
| Marsh, 2008                        | Journal | UK              | Rapid Evidence Assessment/Rapid Review | Interventions | Application | NR | Yes | Protocol not reported | Research question clearly reported |
| McGregor, 2005                     | Journal | Canada          | Validation Study                       | NA            | Evaluation  | NR | Yes | NA                    | NA                                 |
| Mcmurran, 2012                     | Journal | UK              | Rapid Evidence Assessment              | Interventions | Application | NR | Yes | Protocol not reported | Research question clearly reported |
| McRobbie, 2006                     | Report  | UK, New Zealand | Rapid Review                           | Interventions | Application | NR | Yes | Protocol not reported | Research question clearly reported |
| Medical Advisory Secretariat, 2010 | Report  | Canada          | Rapid Review                           | Interventions | Application | NR | Yes | Protocol not reported | Research question clearly reported |
| Middleton,                         | Report  | Australia       | Accelerated                            | Interventions | Application | NR | Yes | Protocol not          | Research                           |

|                |         |                 |                                                                |               |             |           |     |                       |                                    |
|----------------|---------|-----------------|----------------------------------------------------------------|---------------|-------------|-----------|-----|-----------------------|------------------------------------|
| 2003           |         |                 | Systematic Review                                              |               |             |           |     | reported              | question clearly reported          |
| Mitchell, 2011 | Journal | USA             | Rapid Health Technology Assessment (Evidence inventory report) | Frequency     | Application | 3-4 days  | Yes | Protocol not reported | Research question clearly reported |
| Moran, 2011    | Journal | UK              | Rapid Review                                                   | Interventions | Application | NR        | Yes | Protocol not reported | Research question clearly reported |
| Moyad, 2008    | Journal | USA             | Rapid Review                                                   | Interventions | Application | NR        | No  | Protocol not reported | Research question clearly reported |
| Moyad, 2011    | Journal | USA             | Rapid Review / quick review                                    | Interventions | Application | NR        | No  | NA                    | NA                                 |
| Murphy, 2010   | Report  | Canada          | Rapid Review                                                   | Interventions | Application | NR        | Yes | Protocol not reported | Research question clearly reported |
| Nasser, 2011   | Journal | UK              | Rapid Assessment                                               | Interventions | Application | NR        | Yes | Protocol not reported | Research question clearly reported |
| Ndegwa, 2010   | Report  | Canada          | Rapid Review                                                   | Interventions | Application | NR        | Yes | Protocol not reported | Research question clearly reported |
| O' Meara, 2001 | Journal | UK, Netherlands | HTA/Rapid and Systematic Review                                | Interventions | Application | 11 months | Yes | Protocol not reported | Research question clearly reported |
| Obyn, 2008     | Report  | Belgium         | Rapid Assessment                                               | Interventions | Application | NR        | Yes | Protocol not reported | Research question clearly          |

|                       |         |           |                                                                            |               |             |          |     |                       |                                    |
|-----------------------|---------|-----------|----------------------------------------------------------------------------|---------------|-------------|----------|-----|-----------------------|------------------------------------|
|                       |         |           |                                                                            |               |             |          |     | reported              |                                    |
| Parker, 2006          | Report  | UK        | Rapid Experience Review                                                    | Interventions | Application | NR       | No  | NA                    | NA                                 |
| Phillipson, 2012      | Report  | Australia | Rapid Review (evidence check review)                                       | Interventions | Application | NR       | Yes | Protocol not reported | Research question clearly reported |
| Rissel, 2012          | Report  | Australia | Rapid Review/ Comprehensive rapid literature review/ evidence check review | Association   | Application | NR       | Yes | Protocol not reported | Research question clearly reported |
| Saborido, 2010        | Journal | UK        | Overview of Rapid Reviews                                                  | Interventions | Application | 4 months | Yes | Protocol not reported | Research question clearly reported |
| Schnell-Inderst, 2011 | Journal | Germany   | Rapid assessment                                                           | Screening     | Application | NR       | Yes | Protocol not reported | Research question clearly reported |
| Singh, 2005           | Report  | UK        | Rapid Review                                                               | Interventions | Application | NR       | Yes | Protocol not reported | Research question clearly reported |
| Singh, 2006           | Report  | UK        | Rapid Review                                                               | Frequency     | Application | NR       | Yes | Protocol not reported | Research question clearly reported |
| Singh, 2006           | Report  | UK        | Rapid Review                                                               | Frequency     | Application | 3 weeks  | Yes | Protocol not reported | Research question clearly reported |
| Smith, 2013           | Journal | UK        | Rapid Structured review                                                    | Experience    | Application | NR       | Yes | Protocol not reported | Research question clearly          |

|                      |         |           |                                         |               |             |              |     |                         |                                    |
|----------------------|---------|-----------|-----------------------------------------|---------------|-------------|--------------|-----|-------------------------|------------------------------------|
|                      |         |           |                                         |               |             |              |     |                         | reported                           |
| Stordeur, 2009       | Report  | Belgium   | Rapid Assessment                        | Interventions | Application | NR           | Yes | Protocol not reported   | Research question clearly reported |
| Sutton, 2011         | Journal | UK        | Rapid Review                            | Interventions | Application | NR           | Yes | Protocol not reported   | Research question clearly reported |
| Thavaneswaran , 2009 | Report  | Australia | Rapid Systematic Review                 | Interventions | Application | NR           | Yes | Protocol not reported   | Research question clearly reported |
| Thigpen, 2012        | Journal | USA       | Rapid Synthesis and Translation Process | NA            | Development | 10-12 months | Yes | Protocol not reported   | Research question clearly reported |
| Thomas, 2013         | Journal | UK        | Rapid Evidence Assessment               | NA            | Development | NR           | No  | Protocol not reported   | NA                                 |
| Tonmukayakul, 2012   | Journal | Thailand  | Rapid Review                            | Interventions | Application | NR           | Yes | Protocol not reported   | Research question clearly reported |
| Tripney, 2011        | Report  | UK        | Rapid Review                            | Interventions | Application | 6 months     | Yes | Yes, published protocol | Research question clearly reported |
| Tsakonas, 2008       | Report  | Canada    | HTA Rapid Review                        | Diagnosis     | Application | NR           | Yes | Protocol not reported   | Research question clearly reported |
| Van Brabandt, 2009   | Report  | Belgium   | Rapid Health Technology Assessment      | Interventions | Application | NR           | Yes | Protocol not reported   | Research question clearly reported |
| Van Branadt, 2008    | Report  | Belgium   | Rapid Health Technology Assessment      | Interventions | Application | NR           | Yes | Protocol not reported   | Research question clearly          |

|                    |         |                      |                                                    |               |             |          |     |                       |                                    |
|--------------------|---------|----------------------|----------------------------------------------------|---------------|-------------|----------|-----|-----------------------|------------------------------------|
|                    |         |                      |                                                    |               |             |          |     | reported              |                                    |
| Van de Velde, 2011 | Journal | Belgium              | Rapid Review                                       | NA            | Comparison  | 1 month  | Yes | Protocol not reported | Research question not Reported     |
| van Swieten, 2008  | Journal | Netherlands          | Rapid Review                                       | Association   | Application | NR       | No  | NA                    | NA                                 |
| Vlayen, 2006       | Report  | Belgium, Netherlands | Rapid Assessment                                   | Interventions | Application | NR       | Yes | Protocol not reported | Research question clearly reported |
| WHO, 2006          | Report  | NR                   | Rapid Advice Guidelines                            | Interventions | Application | 6 months | Yes | Protocol not reported | Research question clearly reported |
| York, 2011         | Journal | US                   | Rapid Evidence Assessment of the Literature (REAL) | Frequency     | Application | NR       | Yes | Protocol not reported | Research question clearly reported |
| Zechmeister, 2012  | Journal | Austria              | Overview of HTAs                                   | NA            | Evaluation  | NR       | Yes | NA                    | NA                                 |

#### Appendix 4: Terminology, definition, and rapid review citations

| Author, Year                                                                              | Name of Synthesis Method                          | Definition of Rapid Review                                                                                                                                                                                                                                                                                                                                                                                                                    | Rapid Review Methods Cited                                                                                                                                                                                                                                                                                       |
|-------------------------------------------------------------------------------------------|---------------------------------------------------|-----------------------------------------------------------------------------------------------------------------------------------------------------------------------------------------------------------------------------------------------------------------------------------------------------------------------------------------------------------------------------------------------------------------------------------------------|------------------------------------------------------------------------------------------------------------------------------------------------------------------------------------------------------------------------------------------------------------------------------------------------------------------|
| Adi, 2004                                                                                 | Rapid Systematic Reviews                          | Rapid systematic reviews about the effectiveness of healthcare interventions and technologies are produced in response to requests from West Midlands Health Authorities or the HTA programme. Reviews usually take 3-6 months and aim to give a timely and accurate analysis of the quality, strength and direction of the available evidence, generating an economic analysis (where possible a cost utility analysis) of the intervention. | West Midlands HTA Collaboration, The Trent Working Group on Acute Purchasing, The Wessex Institute for Health Research and Development, and The York Centre for Reviews and Dissemination                                                                                                                        |
| Armitage, 2009                                                                            | Rapid Structured Literature Review                | Rapid structured Literature Review has three major stages: conceptualization (the need and problem definition); operational aspects (conducting the literature search); structuring and reporting the RSLR (reporting).                                                                                                                                                                                                                       | NR                                                                                                                                                                                                                                                                                                               |
| Attree, 2011                                                                              | Rapid Review                                      | No definition                                                                                                                                                                                                                                                                                                                                                                                                                                 | NR                                                                                                                                                                                                                                                                                                               |
| Australian Safety and Efficacy Register of New Interventional Procedures – Surgical, 2009 | Brief Review                                      | Brief report, while broad in some aspects of systematic review methodology, should not be considered to be a comprehensive systematic review.                                                                                                                                                                                                                                                                                                 | NR                                                                                                                                                                                                                                                                                                               |
| Bambra, 2010                                                                              | Rapid(non-systematic) Narrative Literature Review | Drawing on the principles of systematic review methodology to identify relevant and accessible evidence within a limited time frame to feed into policy-making                                                                                                                                                                                                                                                                                | NR                                                                                                                                                                                                                                                                                                               |
| Barnighausen, 2012                                                                        | Rapid Review                                      | Rapid reviews are distinct from systematic reviews in that they typically apply stricter inclusion criteria and search fewer databases and sources than systematic reviews                                                                                                                                                                                                                                                                    | Ganann R, Ciliska D, Thomas H. Expediting systematic reviews: methods and implications of rapid reviews. Implement Sci. 2010; 5: 56.<br><br>Watt A, Cameron A, Sturm L, et al. Rapid reviews versus full systematic reviews: an inventory of current methods and practice in health technology assessment. Int J |

|                  |                                                   |                                                                                                                                                                                                                     |                                                                                                                                                                                                                                                                                                                         |
|------------------|---------------------------------------------------|---------------------------------------------------------------------------------------------------------------------------------------------------------------------------------------------------------------------|-------------------------------------------------------------------------------------------------------------------------------------------------------------------------------------------------------------------------------------------------------------------------------------------------------------------------|
|                  |                                                   |                                                                                                                                                                                                                     | Technol Assess Healthcare. 2008; 24: 133-139.                                                                                                                                                                                                                                                                           |
| Batten, 2012     | Rapid Evidence Assessment                         | Rapid evidence assessments are briefer than systematic reviews yet still rely on a focused research question, quality appraisal, and synthesis of research.                                                         | Civil Service (n.d.). What is a rapid evidence assessment? Retrieved September 18, 2012, from <a href="http://www.civilservice.gov.uk/networks/gsr/resources-and-guidance/rapid-evidence-assessment/what-is">http://www.civilservice.gov.uk/networks/gsr/resources-and-guidance/rapid-evidence-assessment/what-is</a> . |
| Beck, 2012       | Rapid Systematic Review of evidence               | In order to produce a robust but also timely appraisal of the evidence, a rapid review methodology was adopted, with the aim of creating a baseline resource which could be used in future for further work.        | NR                                                                                                                                                                                                                                                                                                                      |
| Best, 1997       | Rapid and responsive health technology assessment | No definition                                                                                                                                                                                                       | Stevens A, Colin-Jones D, Gabbay J. 'Quick and clean': authoritative health technology assessment for local health care contracting. Health Trends. 1995; 27(2):37-42.                                                                                                                                                  |
| Best, 2012       | Rapid Realist Review                              | A rapid review of a restricted literature and should therefore be seen as preliminary                                                                                                                               | Greenhalgh T, Robert G, Macfarlane F. et al. Diffusion of innovations in service organisations: Systematic review and recommendations. The Millbank Quarterly. 2004; 82: 581-629.                                                                                                                                       |
| Birmingham, 2008 | Rapid Review                                      | No definition                                                                                                                                                                                                       | NR                                                                                                                                                                                                                                                                                                                      |
| Blank, 2012      | Rapid Evidence Assessment                         | Rapid evidence assessment (REA) provides a 'balanced assessment of what is already known about a policy or practice issue, by using systematic review methods to search and critically appraise existing research'. | Rapid Evidence Assessment (2011). Retrieved from <a href="http://www.civilservice.gov.uk/networks/gsr/resources-and-guidance/rapid-evidence-assessment">http://www.civilservice.gov.uk/networks/gsr/resources-and-guidance/rapid-evidence-assessment</a> (on 5 April 2011).                                             |
| Boycott, 2012    | Rapid Evidence Assessment                         | Rapid evidence assessment provides an overview of existing research on a specific research topic, as well as a simple extraction and synthesis of the relevant data                                                 | Civil Service (n.d.). What is a rapid evidence assessment? 2011: <a href="http://www.civilservice.gov.uk/networks/gsr/resources-and-guidance/rapid-evidence-assessment/what-is">http://www.civilservice.gov.uk/networks/gsr/resources-and-guidance/rapid-evidence-assessment/what-is</a>                                |
| Brearley, 2011   | Rapid Review                                      | No definition                                                                                                                                                                                                       | NR                                                                                                                                                                                                                                                                                                                      |
| Brown, 2008      | Health Technology Assessment<br>Rapid Review      | No definition                                                                                                                                                                                                       | NR                                                                                                                                                                                                                                                                                                                      |
| Brunton, 2013    | Systematic                                        | A rapid evidence assessment differs from more traditional                                                                                                                                                           | Ganann R, Ciliska D, Thomas H.                                                                                                                                                                                                                                                                                          |

|               |                                         |                                                                                                                                                                                                                                                                                                                                                                                                               |                                                                                                                                                                                                                                                         |
|---------------|-----------------------------------------|---------------------------------------------------------------------------------------------------------------------------------------------------------------------------------------------------------------------------------------------------------------------------------------------------------------------------------------------------------------------------------------------------------------|---------------------------------------------------------------------------------------------------------------------------------------------------------------------------------------------------------------------------------------------------------|
|               | Rapid Evidence Review (SREA)            | systematic reviews in that it is conducted within a shorter timeframe, often on focused issues (Gough et al. 2012). However, these differences in methodology used to adapt to the tight timelines must be carefully described and their impact on the findings considered, in order for the research to remain transparent and accountable (Ganann et al. 2010).                                             | Expediting systematic reviews: methods and implications of rapid reviews. Implementation Science. 2010; 5: 56. <a href="http://www.implementationscience.com/content/5/1/56">www.implementationscience.com/content/5/1/56</a> . (Accessed 24 Oct 2012). |
| Bryant, 2006  | Rapid Literature Review                 | No definition                                                                                                                                                                                                                                                                                                                                                                                                 | NR                                                                                                                                                                                                                                                      |
| Bullock, 2010 | expedited systematic Review             | No definition                                                                                                                                                                                                                                                                                                                                                                                                 | NR                                                                                                                                                                                                                                                      |
| Bungay, 2013  | Rapid Review                            | Rapid reviews are literature reviews that are conducted systematically within a limited time frame                                                                                                                                                                                                                                                                                                            |                                                                                                                                                                                                                                                         |
| Burls, 2002   | Rapid Review                            | Rapid reviews are completed in a limited time to inform the appraisal and guideline development processes. The review brings together evidence on key aspects of the use of the technology concerned.                                                                                                                                                                                                         | Burls A, Cummins C, Jordan R. et al. West Midlands Development and Evaluation Service (DES) Handbook. Birmingham: University of Birmingham; 1998.                                                                                                       |
| Butler, 2004  | Rapid Evidence Assessment               | A systematic assessment of the best available evidence that follows the principles of a systematic review, but concessions are made in order to complete reviews in a shorter time scale. Grey literature is not included.                                                                                                                                                                                    | NR                                                                                                                                                                                                                                                      |
| Butt, 2010    | Rapid Systematic Review                 | No definition                                                                                                                                                                                                                                                                                                                                                                                                 |                                                                                                                                                                                                                                                         |
| Caird, 2012   | Systematic Rapid Evidence Review (SREA) | A systematic rapid evidence assessment (SREA) represents the only way in which a broad policy question may be answered within a tight timescale.                                                                                                                                                                                                                                                              | NR                                                                                                                                                                                                                                                      |
| Cameron, 2007 | Rapid Review                            | Any HTA report or systematic review that has taken between 1-6 months to produce which contains the elements of a comprehensive literature search. The concept of 'rapid review' is increasing, driven primarily by this need to engage with clinicians, consumers and policy makers in a timely manner in order to provide evidence-based recommendations pertaining to healthcare activities and decisions. | NR                                                                                                                                                                                                                                                      |
| Carr, 2011    | Rapid Evidence Assessment               | No definition                                                                                                                                                                                                                                                                                                                                                                                                 | NR                                                                                                                                                                                                                                                      |

|                                 |                                           |                                                                                                                                                                                                                                                                                                                                |                                                                                                                                     |
|---------------------------------|-------------------------------------------|--------------------------------------------------------------------------------------------------------------------------------------------------------------------------------------------------------------------------------------------------------------------------------------------------------------------------------|-------------------------------------------------------------------------------------------------------------------------------------|
|                                 | project                                   |                                                                                                                                                                                                                                                                                                                                |                                                                                                                                     |
| Clark, 2003                     | Health Technology Assessment/Rapid Review | No definition                                                                                                                                                                                                                                                                                                                  | NR                                                                                                                                  |
| Coomber, 2004                   | Rapid Interim Review                      | No definition                                                                                                                                                                                                                                                                                                                  | NR                                                                                                                                  |
| Cragg, 2008                     | Rapid Evidence Review and Appraisal       | No definition                                                                                                                                                                                                                                                                                                                  | NR                                                                                                                                  |
| Cummins, 2001                   | Rapid Review                              | No definition                                                                                                                                                                                                                                                                                                                  | NR                                                                                                                                  |
| De Laet, 2008                   | Rapid Assessment                          | No definition                                                                                                                                                                                                                                                                                                                  | NR                                                                                                                                  |
| Dixon-Woods, 2012               | Literature Review                         | No definition                                                                                                                                                                                                                                                                                                                  | NR                                                                                                                                  |
| Doran, 2013                     | Rapid Review (evidence check Review)      | It is not necessarily a comprehensive review of all literature relating to the topic area.                                                                                                                                                                                                                                     | NR                                                                                                                                  |
| Fitzpatrick-Lewis, 2011         | Rapid Systematic Review                   | No definition                                                                                                                                                                                                                                                                                                                  | NR                                                                                                                                  |
| Foerster, 2007                  | Health Technology Assessment/Rapid Review | The report is based on a limited literature search and is not comprehensive, systematic reviews. The intent is to provide a list of sources and a summary of the best evidence on the topic that CADTH could identify using all reasonable efforts within the time allowed.                                                    | NR                                                                                                                                  |
| Geddes, 2011                    | Rapid Review                              | Rapid reviews are literature reviews that use methods to accelerate or streamline traditional systematic review processes. Target audiences for rapid reviews include government policymakers, healthcare institutions, health professionals, and patient associations to inform health system planning and policy development | Ganann R, Ciliska D, Thomas H. Expediting systematic reviews: methods and implications of rapid reviews. Implement Sci. 2010; 5:56. |
| Government Social Research 2007 | Rapid Review                              | No definition                                                                                                                                                                                                                                                                                                                  | NR                                                                                                                                  |
| Hildon, 2012                    | Rapid Review                              | No definition                                                                                                                                                                                                                                                                                                                  | NR                                                                                                                                  |
| Hulstaert, 2009                 | Rapid Assessment                          | No definition                                                                                                                                                                                                                                                                                                                  | NR                                                                                                                                  |
| Jahangirian,                    | Rapid Review                              | No definition                                                                                                                                                                                                                                                                                                                  | NR                                                                                                                                  |

|               |                           |                                                                                                                                                                                                                                                                                                                                                                                                                                                                       |                                                                                                                                                                                                                                                                                                                                                                                                                                                                                                                                                                                                                                                                                                                                                                              |
|---------------|---------------------------|-----------------------------------------------------------------------------------------------------------------------------------------------------------------------------------------------------------------------------------------------------------------------------------------------------------------------------------------------------------------------------------------------------------------------------------------------------------------------|------------------------------------------------------------------------------------------------------------------------------------------------------------------------------------------------------------------------------------------------------------------------------------------------------------------------------------------------------------------------------------------------------------------------------------------------------------------------------------------------------------------------------------------------------------------------------------------------------------------------------------------------------------------------------------------------------------------------------------------------------------------------------|
| 2011          |                           |                                                                                                                                                                                                                                                                                                                                                                                                                                                                       |                                                                                                                                                                                                                                                                                                                                                                                                                                                                                                                                                                                                                                                                                                                                                                              |
| Joliffe, 2007 | Rapid Evidence Assessment | The main difference between a systematic review and a REA is the restriction of the time period available to search for eligible studies                                                                                                                                                                                                                                                                                                                              | NR                                                                                                                                                                                                                                                                                                                                                                                                                                                                                                                                                                                                                                                                                                                                                                           |
| Kelly, 2011   | Rapid Review              | Rapid reviews are a new and contentious approach to knowledge transfer and exchange between researchers and policy makers. They are typically conducted in months rather than years and the focus is determined by policy-makers rather than researchers. The strength of a rapid review lies in its timeliness and responsiveness to the needs of policy makers and practitioners, but its limitations include the reliability and generalisability of the findings. | <p>Gannan R, Cilska D, Thomas H. Expediting systematic reviews: methods and implications of rapid reviews. Implementation Science 2010; 5(56).</p> <p>Abrami PC, Borokhovski E, Bernerd R, et al. Issues in conducting and disseminating brief reviews of evidence. Evidence and Policy. 2010; 6(3): 371-89.</p> <p>Butler G, Deaton S, Hodgkinson J, et al. Quick but not dirty: rapidevidence assessments as a decision support tool in social policy. Government Social Research Unit, 2005. London; 2005.</p>                                                                                                                                                                                                                                                            |
| Konnyu, 2012  | Rapid Review              | Rapid reviews have emerged as a streamlined approach to synthesizing evidence quickly, typically for the purpose of helping decision-makers in health care and health services settings respond in a timely manner to urgent and emerging needs                                                                                                                                                                                                                       | <p>Ganann R, Ciliska D, Thomas H. Expediting systematic reviews: methods and implications of rapid reviews. Implement Sci. 2010; 5: 56.</p> <p>Information services CADTH. Grey matters: A practical search tool for evidence-based medicine. Canadian Agency for Drugs and Technologies in Health. 2011. Available from: <a href="http://www.cadth.ca/resources/grey-matters">http://www.cadth.ca/resources/grey-matters</a>.</p> <p>Watt A, Cameron A, Sturm L. et al. Rapid versus full systematic reviews: Validity in clinical practice? ANZ J Surg. 2008; 78(11): 1037-1040. SUPPORT Collaboration. SUPPORT: Supporting Policy Relevant Reviews and Trials. 2011. Available from <a href="http://www.support-collaboration.org">www.support-collaboration.org</a>.</p> |

|               |                                      |                                                                                                                                                                                                                                                                                                                                                                                                      |    |
|---------------|--------------------------------------|------------------------------------------------------------------------------------------------------------------------------------------------------------------------------------------------------------------------------------------------------------------------------------------------------------------------------------------------------------------------------------------------------|----|
| Legrand, 2008 | Rapid Assessment                     | No definition                                                                                                                                                                                                                                                                                                                                                                                        | NR |
| Lewis, 2001   | Rapid and Systematic Review          | Rapid reviews are completed in a limited time to inform the appraisal and guideline development processes. The review brings together evidence on key aspects of the use of the technology concerned.                                                                                                                                                                                                | NR |
| Low, 2006     | Rapid Review                         | No definition                                                                                                                                                                                                                                                                                                                                                                                        | NR |
| Maddern, [NR] | Rapid Review/rapid Systematic Review | A rapid systematic review in which the methodology has been limited in one or more areas to shorten the timeline for its completion. This rapid review is a limited evidence-based assessment that is based on a simple systematic search of studies published in the peer reviewed literature. As a result, this rapid review may be used to inform certain questions on the specific review topic. | NR |
| Maddern, [NR] | Rapid Systematic Review              | A rapid systematic review in which the methodology has been limited in one or more areas to shorten the timeline for its completion. This rapid review is a limited evidence-based assessment that is based on a simple systematic search of studies published in the peer reviewed literature. As a result, this rapid review may be used to inform certain questions on the specific review topic. | NR |
| Maddern, [NR] | Rapid Systematic Review              | A rapid systematic review in which the methodology has been limited in one or more areas to shorten the timeline for its completion. This rapid review is a limited evidence-based assessment that is based on a simple systematic search of studies published in the peer reviewed literature. As a result, this rapid review may be used to inform certain questions on the specific review topic. | NR |
| Maddern, [NR] | Rapid Systematic Review              | A rapid systematic review in which the methodology has been limited in one or more areas to shorten the timeline for its completion. This rapid review is a limited evidence-based assessment that is based on a simple systematic search of studies published in the peer reviewed literature. As a result, this rapid review may be used to inform certain questions on the specific review topic. | NR |
| Maddern, 2008 | Rapid Systematic Review              | A rapid systematic review in which the methodology has been limited in one or more areas to shorten the timeline for its completion. This rapid review is a limited evidence-based assessment that is based on a simple systematic search of studies published in the peer reviewed literature. As a result, this rapid                                                                              | NR |

|                 |                                                                |                                                                                                                                                                                                                                                                                                                                                                                                                                                                    |                                                                                                                                                                                                                                                                                                                                                                      |
|-----------------|----------------------------------------------------------------|--------------------------------------------------------------------------------------------------------------------------------------------------------------------------------------------------------------------------------------------------------------------------------------------------------------------------------------------------------------------------------------------------------------------------------------------------------------------|----------------------------------------------------------------------------------------------------------------------------------------------------------------------------------------------------------------------------------------------------------------------------------------------------------------------------------------------------------------------|
|                 |                                                                | review may be used to inform certain questions on the specific review topic.                                                                                                                                                                                                                                                                                                                                                                                       |                                                                                                                                                                                                                                                                                                                                                                      |
| Mann, 2011      | Rapid Review                                                   | No definition                                                                                                                                                                                                                                                                                                                                                                                                                                                      | NR                                                                                                                                                                                                                                                                                                                                                                   |
| Marsh, 2008     | Rapid Evidence Assessment/Rapid Review                         | No definition                                                                                                                                                                                                                                                                                                                                                                                                                                                      | NR                                                                                                                                                                                                                                                                                                                                                                   |
| Mcmurran, 2012  | Rapid Evidence Assessment                                      | A briefer version of a full systematic review, devised originally for informing policy decision-making quickly                                                                                                                                                                                                                                                                                                                                                     | Civil Service (2009) REA methods – Rapid Evidence Assessment. Retrieved June 13, 2011 from <a href="http://www.civilservice.gov.uk/my-civil-service/networks/professional/gsr/resources/rea-methodsrapid-evidence-assessment.aspx">http://www.civilservice.gov.uk/my-civil-service/networks/professional/gsr/resources/rea-methodsrapid-evidence-assessment.aspx</a> |
| McRobbie, 2006  | Rapid Review                                                   | No definition                                                                                                                                                                                                                                                                                                                                                                                                                                                      | NR                                                                                                                                                                                                                                                                                                                                                                   |
| Middleton, 2003 | Accelerated Systematic Review                                  | Accelerated systematic reviews are produced in response to a pressing need for a systematic summary and appraisal of the available literature for a new or emerging surgical procedure. They use the same methodology as full systematic reviews, but may restrict the types of studies considered (for example, by only including comparative studies and not case series) in order to produce the review in a shorter time period than a full systematic review. | NR                                                                                                                                                                                                                                                                                                                                                                   |
| Mitchell, 2011  | Rapid Health Technology Assessment (Evidence inventory report) | Expedited production of short-form evidence inventory reports. In an evidence inventory report the authors leave the 'patient' element of PICO unspecified and then assess how much evidence there is for the intervention in question, stratifying by patient group. The inventory process would work equally well assessing the quantity of evidence on different variations of a particular intervention for a particular patient group.                        | NR                                                                                                                                                                                                                                                                                                                                                                   |
| Moran, 2011     | Rapid Review                                                   | No definition                                                                                                                                                                                                                                                                                                                                                                                                                                                      | NR                                                                                                                                                                                                                                                                                                                                                                   |
| Murphy, 2010    | Rapid Review                                                   | No definition                                                                                                                                                                                                                                                                                                                                                                                                                                                      | NR                                                                                                                                                                                                                                                                                                                                                                   |
| Nasser, 2011    | Rapid Assessment                                               | No definition                                                                                                                                                                                                                                                                                                                                                                                                                                                      | NR                                                                                                                                                                                                                                                                                                                                                                   |
| Ndegwa, 2010    | Rapid Review                                                   | No definition                                                                                                                                                                                                                                                                                                                                                                                                                                                      | NR                                                                                                                                                                                                                                                                                                                                                                   |
| Obyn, 2008      | Rapid Assessment                                               | No definition                                                                                                                                                                                                                                                                                                                                                                                                                                                      | NR                                                                                                                                                                                                                                                                                                                                                                   |
| O'Meara, 2001   | HTA/Rapid and Systematic                                       | Reviews in Health Technology Assessment are termed systematic when the account of the search appraisal and                                                                                                                                                                                                                                                                                                                                                         | NR                                                                                                                                                                                                                                                                                                                                                                   |

|                       |                                                                            |                                                                                                                                                                                                                                                                                                                                                                                                                                                                                  |                                                                                                                                                                  |
|-----------------------|----------------------------------------------------------------------------|----------------------------------------------------------------------------------------------------------------------------------------------------------------------------------------------------------------------------------------------------------------------------------------------------------------------------------------------------------------------------------------------------------------------------------------------------------------------------------|------------------------------------------------------------------------------------------------------------------------------------------------------------------|
|                       | Review                                                                     | synthesis methods would, in theory, permit the replication of the review by others. Rapid reviews are completed in a limited time to inform the appraisal and guideline development processes managed by NICE.                                                                                                                                                                                                                                                                   |                                                                                                                                                                  |
| Phillips, 2012        | Rapid Review (evidence check Review)                                       | This evidence check review was produced using the evidence check methodology in response to specific questions from the commissioning agency. It is not necessarily a comprehensive review of all literature relating to the topic area.                                                                                                                                                                                                                                         | NR                                                                                                                                                               |
| Rissel, 2012          | Rapid Review/ Comprehensive rapid literature Review/ evidence check Review | This evidence check review was produced using the evidence check methodology in response to specific questions from the commissioning agency. It is not necessarily a comprehensive review of all literature relating to the topic area.                                                                                                                                                                                                                                         | NR                                                                                                                                                               |
| Saborido, 2010        | Overview of Rapid Reviews                                                  | No definition                                                                                                                                                                                                                                                                                                                                                                                                                                                                    | NR                                                                                                                                                               |
| Schnell-Inderst, 2011 | Rapid assessment                                                           | No definition                                                                                                                                                                                                                                                                                                                                                                                                                                                                    | NR                                                                                                                                                               |
| Singh, 2005           | Rapid Review                                                               | No definition                                                                                                                                                                                                                                                                                                                                                                                                                                                                    | NR                                                                                                                                                               |
| Singh, 2006a          | Rapid Review                                                               | No definition                                                                                                                                                                                                                                                                                                                                                                                                                                                                    | NR                                                                                                                                                               |
| Singh, 2006b          | Rapid Review                                                               | No definition                                                                                                                                                                                                                                                                                                                                                                                                                                                                    | NR                                                                                                                                                               |
| Smith, 2013           | Rapid structured Review                                                    | Rapid structured reviews are used to summarize and synthesis research findings within the constraints of a given timetable and resources and differ from systematic review in relation to the extensiveness of the literature search and methods used to undertake the analysis                                                                                                                                                                                                  | Armitage A, Keeble-Ramsay D. The rapid structured literature review as a research strategy. Education Review. 2009; 6: 27-37.                                    |
| Stordeur, 2009        | Rapid Assessment                                                           | No definition                                                                                                                                                                                                                                                                                                                                                                                                                                                                    | NR                                                                                                                                                               |
| Sutton, 2011          | Rapid Review                                                               | Assessment of what is already known about a policy or practice issue, by using systematic review methods to search and critically appraise existing research. Rapid reviews, by their very nature, are constrained by time, and this impact on the completeness of searching undertaken and the depth of formal quality assessment. Nonetheless, this type of review can provide a general indication of the overall quality and direction of effect reported in the literature. | Grant MJ, Booth A. A typology of reviews: an analysis of 14 review types and associated methodologies. Health Information & Libraries Journal. 2009; 26: 91-108. |
| Thavaneswaran, 2009   | Rapid systematic Review                                                    | A rapid systematic review in which the methodology has been limited in one or more areas to shorten the timeline for its completion. This rapid review is a limited evidence-based                                                                                                                                                                                                                                                                                               | NR                                                                                                                                                               |

|                                        |                                         |                                                                                                                                                                                                                                                                                                                                                                                                                                                                                                                          |                                                                                                                                                                                                                                                                                                                                                                                                                                                                                                                                                                                                                                                                                                                                                                                                                                |
|----------------------------------------|-----------------------------------------|--------------------------------------------------------------------------------------------------------------------------------------------------------------------------------------------------------------------------------------------------------------------------------------------------------------------------------------------------------------------------------------------------------------------------------------------------------------------------------------------------------------------------|--------------------------------------------------------------------------------------------------------------------------------------------------------------------------------------------------------------------------------------------------------------------------------------------------------------------------------------------------------------------------------------------------------------------------------------------------------------------------------------------------------------------------------------------------------------------------------------------------------------------------------------------------------------------------------------------------------------------------------------------------------------------------------------------------------------------------------|
|                                        |                                         | assessment that is based on a simple systematic search of studies published in the peer reviewed literature. As a result, this rapid review may be used to inform certain questions on the specific review topic.                                                                                                                                                                                                                                                                                                        |                                                                                                                                                                                                                                                                                                                                                                                                                                                                                                                                                                                                                                                                                                                                                                                                                                |
| The Medical Advisory Secretariat, 2010 | Rapid Review                            | No definition                                                                                                                                                                                                                                                                                                                                                                                                                                                                                                            | NR                                                                                                                                                                                                                                                                                                                                                                                                                                                                                                                                                                                                                                                                                                                                                                                                                             |
| Thigpen, 2012                          | Rapid synthesis and translation process | The Rapid Synthesis and Translation Program is collaborative and by using Lomas' exchange model of knowledge transfer bridges the gap between research and practice by keeping researchers and practitioners involved from the beginning. The RSTP borrows from other policy and science synthesis and translation literature much of which is related to knowledge transfer includes processes or components related to translation.                                                                                    | <p>Ganann R, Ciliska D, Thomas H. Expediting systematic reviews: methods and implications of rapid reviews. Implementation Science. 2010; 5: 56.</p> <p>Jack S, Tommyr L. Knowledge transfer and exchange: Disseminating Canadian child maltreatment surveillance findings to decision makers. Child Indicators Research. 2008; 1: 51-64.</p> <p>Reardon R, Lavis J, Gibson J. From research to practice: A knowledge transfer planning guide. Toronto, ON: Institute for Work and Health.</p> <p>Mallonee S, Fowler C, Istre GR. Bridging the gap between research and practice: A continuing challenge. Injury prevention. 2006; 12: 357-359. Robert Wood Johnson Foundation. (2009). The synthesis project. Retrieved from <a href="http://rwjf.org/pr/synthesis/about.jsp">http://rwjf.org/pr/synthesis/about.jsp</a>.</p> |
| Tripney, 2011                          | Rapid Review                            | No definition                                                                                                                                                                                                                                                                                                                                                                                                                                                                                                            | NR                                                                                                                                                                                                                                                                                                                                                                                                                                                                                                                                                                                                                                                                                                                                                                                                                             |
| Tsakonas, 2008                         | HTA rapid Review                        | HTIS responses are based on a limited literature search and are not comprehensive, systematic reviews. The intent is to provide a list of sources and a summary of the best evidence on the topic that CADTH could identify using all reasonable efforts within the time allowed. HTIS responses should be considered along with other types of information and health care considerations. The information included in this response is not intended to replace professional medical advice, nor should it be construed | NR                                                                                                                                                                                                                                                                                                                                                                                                                                                                                                                                                                                                                                                                                                                                                                                                                             |

| as a recommendation for or against the use of a particular health technology. |                                                    |                                                                                                                                                                                                                 |    | *NR,<br>not<br>reported |
|-------------------------------------------------------------------------------|----------------------------------------------------|-----------------------------------------------------------------------------------------------------------------------------------------------------------------------------------------------------------------|----|-------------------------|
| Van Branadt, 2008                                                             | Rapid Health Technology Assessment                 | No definition                                                                                                                                                                                                   | NR |                         |
| Van Branadt, 2009                                                             | Rapid Health Technology Assessment                 | No definition                                                                                                                                                                                                   | NR |                         |
| Vlayen, 2006                                                                  | Rapid Assessment                                   | No definition                                                                                                                                                                                                   | NR |                         |
| WHO, 2006                                                                     | Rapid Advice Guidelines                            | No definition                                                                                                                                                                                                   | NR |                         |
| York, 2011                                                                    | Rapid Evidence Assessment of the Literature (REAL) | The Rapid Evidence Assessment of the Literature approach differs from a conventional systematic literature review in that a REAL provides an evidence-based, systematic “snapshot” of the available literature. | NR |                         |

## Appendix 5: Rapid review methods details

| Author, Year   | Definition                                                                                                                                                                                                                                                                                                                                                                                                                                    | Duration of Review | General (published protocol, review questions)             | Literature Search (i.e., databases, grey literature, reference scanning, contacting authors)                                                               | Inclusion Criteria (i.e., limited by data, language and study design)              | Screening (i.e., title & abstract, full-text)     | Data Abstraction and Quality Appraisal                                     | Data Synthesis                     |
|----------------|-----------------------------------------------------------------------------------------------------------------------------------------------------------------------------------------------------------------------------------------------------------------------------------------------------------------------------------------------------------------------------------------------------------------------------------------------|--------------------|------------------------------------------------------------|------------------------------------------------------------------------------------------------------------------------------------------------------------|------------------------------------------------------------------------------------|---------------------------------------------------|----------------------------------------------------------------------------|------------------------------------|
| Adi, 2004      | Rapid systematic reviews about the effectiveness of healthcare interventions and technologies are produced in response to requests from West Midlands Health Authorities or the HTA programme. Reviews usually take 3-6 months and aim to give a timely and accurate analysis of the quality, strength and direction of the available evidence, generating an economic analysis (where possible a cost utility analysis) of the intervention. | 3-6 months         | Protocol not mentioned; Research question clearly reported | Searched more than one database; Searched published and grey literature; Search strategy clearly reported; Yes, references scanned; Yes, authors contacted | No Date limit; No Language limit; No limit on study design                         | L1 - two independent reviewers; L2 - Not reported | DA - One reviewer and one verifier; QA - One reviewer only                 | Narrative/descriptive summary only |
| Armitage, 2009 | Rapid structured Literature Review has three major stages: conceptualization (the need and problem definition); operational aspects (conducting the                                                                                                                                                                                                                                                                                           | 6 months           | Protocol not mentioned; Research question clearly reported | Database search not reported; Searched published and grey literature; Search strategy clearly reported; Reference scanning                                 | Data limit unclear/not reported; Language limit unclear/not reported; Study design | L1 - not reported; L2 - Not reported              | DA - Done but unclear number of reviewers; QA - Done but unclear number of | Narrative/descriptive summary only |

|                                                                                                                       |                                                                                                                                                                                     |           |                                                                           |                                                                                                                                                                                                        |                                                                                                                     |                                                                                             |                                                                                                           |                                                        |
|-----------------------------------------------------------------------------------------------------------------------|-------------------------------------------------------------------------------------------------------------------------------------------------------------------------------------|-----------|---------------------------------------------------------------------------|--------------------------------------------------------------------------------------------------------------------------------------------------------------------------------------------------------|---------------------------------------------------------------------------------------------------------------------|---------------------------------------------------------------------------------------------|-----------------------------------------------------------------------------------------------------------|--------------------------------------------------------|
|                                                                                                                       | literature search);<br>structuring and<br>reporting the RSLR<br>(reporting)                                                                                                         |           |                                                                           | not reported;<br>Contacting authors<br>not reported                                                                                                                                                    | unclear/not<br>reported                                                                                             |                                                                                             | reviewers                                                                                                 |                                                        |
| Attree, 2011                                                                                                          | No definition                                                                                                                                                                       | 12 months | Protocol not<br>mentioned;<br>Research<br>question<br>clearly<br>reported | Searched more<br>than one database;<br>Searched published<br>and grey literature;<br>Search strategy not<br>reported; Reference<br>scanning not<br>reported;<br>Contacting authors<br>not reported     | Data limit<br>unclear/not<br>reported;<br>Language limit<br>unclear/not<br>reported; No<br>limit on study<br>design | L1 - one<br>reviewer<br>and one<br>verifier; L2<br>- One<br>reviewer<br>and one<br>verifier | DA - Done<br>but unclear<br>number of<br>reviewers;<br>QA - Done<br>but unclear<br>number of<br>reviewers | Narrative/d<br>escriptive<br>summary<br>only           |
| Australian<br>Safety and<br>Efficacy<br>Register of<br>New<br>Intervention<br>al<br>Procedures –<br>Surgical,<br>2009 | Brief report, while<br>broad in some aspects<br>of systematic review<br>methodology, should<br>not be considered to be<br>a comprehensive<br>systematic review.                     | NR        | Protocol not<br>mentioned;<br>Research<br>question<br>clearly<br>reported | Searched more<br>than one database;<br>Searched published<br>and grey literature;<br>Search strategy<br>clearly reported;<br>Reference scanning<br>not reported;<br>Contacting authors<br>not reported | Limited by<br>date; Limited<br>by language;<br>Limited by<br>study design                                           | L1 - not<br>reported;<br>L2 - Not<br>reported                                               | DA - One<br>reviewer<br>only; QA -<br>Not<br>reported                                                     | Clear<br>reasons for<br>not doing<br>meta-<br>analysis |
| Bambra,<br>2010                                                                                                       | Drawing on the<br>principles of systematic<br>review methodology to<br>identify relevant and<br>accessible evidence<br>within a limited time<br>frame to feed into<br>policy-making | 6 months  | Protocol not<br>mentioned;<br>Research<br>question<br>clearly<br>reported | Searched more<br>than one database;<br>Searched published<br>sources only;<br>Search strategy not<br>reported; Reference<br>scanning not<br>reported;<br>Contacting authors<br>not reported            | Limited by<br>date; Language<br>limit<br>unclear/not<br>reported;<br>Limited by<br>study design                     | L1 - not<br>reported;<br>L2 - Not<br>reported                                               | DA - Done<br>but unclear<br>number of<br>reviewers;<br>QA - Done<br>but unclear<br>number of<br>reviewers | Narrative/d<br>escriptive<br>summary<br>only           |
| Barnighausen, 2012                                                                                                    | Rapid reviews are<br>distinct from systematic<br>reviews in that they<br>typically apply stricter<br>inclusion criteria and<br>search fewer databases                               | NR        | Protocol not<br>mentioned;<br>Research<br>question<br>clearly<br>reported | Searched one<br>database only;<br>Searched published<br>sources only;<br>Search strategy<br>clearly reported;                                                                                          | Limited by<br>date; Language<br>limit<br>unclear/not<br>reported;<br>Limited by                                     | L1 - not<br>reported;<br>L2 - Not<br>reported                                               | DA - One<br>reviewer<br>only; QA -<br>Not<br>reported                                                     | Narrative/d<br>escriptive<br>summary<br>only           |

|              |                                                                                                                                                                                                              |          |                                                            |                                                                                                                                                                             |                                                                                                         |                                                                                      |                                                              |                                        |
|--------------|--------------------------------------------------------------------------------------------------------------------------------------------------------------------------------------------------------------|----------|------------------------------------------------------------|-----------------------------------------------------------------------------------------------------------------------------------------------------------------------------|---------------------------------------------------------------------------------------------------------|--------------------------------------------------------------------------------------|--------------------------------------------------------------|----------------------------------------|
|              | and sources than systematic reviews                                                                                                                                                                          |          |                                                            | Yes, references scanned; Yes, authors contacted                                                                                                                             | study design                                                                                            |                                                                                      |                                                              |                                        |
| Batten, 2012 | Rapid evidence assessments are briefer than systematic reviews yet still rely on a focused research question, quality appraisal, and synthesis of research.                                                  | 6 months | Protocol not mentioned; Research question clearly reported | Database search not reported; Searched published sources only; Search strategy not reported; Reference scanning not reported; Contacting authors not reported               | Data limit unclear/not reported; Language limit unclear/not reported; Study design unclear/not reported | L1 - not reported; L2 - Not reported                                                 | DA - Not reported; QA - Done but unclear number of reviewers | Unclear/limited data synthesis methods |
| Beck, 2012   | In order to produce a robust but also timely appraisal of the evidence, a rapid review methodology was adopted, with the aim of creating a baseline resource which could be used in future for further work. | NR       | Protocol not mentioned; Research question clearly reported | Searched more than one database; Searched published and grey literature; Search strategy clearly reported; Yes, references scanned; Contacting authors not reported         | Limited by date; Limited by language; Limited by study design                                           | L1 - Done but unclear number of reviewers; L2 - Done but unclear number of reviewers | DA - Done but unclear number of reviewers; QA - Not reported | Narrative/descriptive summary only     |
| Best, 1997   | No definition                                                                                                                                                                                                | 2 months | Protocol not mentioned; Research question unclear/inferred | Searched more than one database; Searched published and grey literature; Search strategy clearly reported; Reference scanning not reported; Contacting authors not reported | Data limit unclear/not reported; Language limit unclear/not reported; No limit on study design          | L1 - not done; L2 - Not reported                                                     | DA - Not reported; QA - Done but unclear number of reviewers | Meta-analysis and narrative summary    |
| Best, 2012   | A rapid review of a restricted literature and should therefore be seen as preliminary                                                                                                                        | 6 months | Protocol not mentioned; Research question clearly reported | Searched more than one database; Searched published and grey literature; Search strategy clearly reported; Yes, references                                                  | Limited by date; Language limit unclear/not reported; Study design unclear/not                          | L1 - two independent reviewers; L2 - Done but unclear number of reviewers            | DA - Done but unclear number of reviewers; QA - Not reported | Narrative/descriptive summary only     |

|                                                                                |                                                                                                                                                                                                                                                   |    |                                                                           |                                                                                                                                                                                    |                                                                                        |                                                                                                           |                                                                                                           |                                                        |
|--------------------------------------------------------------------------------|---------------------------------------------------------------------------------------------------------------------------------------------------------------------------------------------------------------------------------------------------|----|---------------------------------------------------------------------------|------------------------------------------------------------------------------------------------------------------------------------------------------------------------------------|----------------------------------------------------------------------------------------|-----------------------------------------------------------------------------------------------------------|-----------------------------------------------------------------------------------------------------------|--------------------------------------------------------|
|                                                                                |                                                                                                                                                                                                                                                   |    |                                                                           | scanned;<br>Contacting authors<br>not reported                                                                                                                                     | reported                                                                               |                                                                                                           |                                                                                                           |                                                        |
| Birmingham<br>and Black<br>County<br>Strategic<br>Health<br>Authority,<br>2008 | No definition                                                                                                                                                                                                                                     | NR | Protocol not<br>mentioned;<br>Research<br>question<br>clearly<br>reported | Searched more<br>than one database;<br>Searched published<br>and grey literature;<br>Search strategy<br>clearly reported;<br>Yes, references<br>scanned; Yes,<br>authors contacted | Limited by<br>date; No<br>Language limit;<br>Limited by<br>study design                | L1 - two<br>independen<br>t reviewers;<br>L2 - Two<br>independen<br>t reviewers                           | DA - One<br>reviewer<br>and one<br>verifier;<br>QA - Done<br>but unclear<br>number of<br>reviewers        | Clear<br>reasons for<br>not doing<br>meta-<br>analysis |
| Blank, 2012                                                                    | Rapid evidence<br>assessment (REA)<br>provides a 'balanced<br>assessment of what is<br>already known about a<br>policy or practice issue,<br>by using systematic<br>review methods to<br>search and critically<br>appraise existing<br>research'. | NR | Protocol not<br>mentioned;<br>Research<br>question<br>clearly<br>reported | Searched more<br>than one database;<br>Searched published<br>sources only;<br>Search strategy<br>clearly reported;<br>Yes, references<br>scanned; No<br>authors contacted          | Limited by<br>date; Limited<br>by language;<br>Study design<br>unclear/not<br>reported | L1 - Done<br>but unclear<br>number of<br>reviewers;<br>L2 - Done<br>but unclear<br>number of<br>reviewers | DA - One<br>reviewer<br>and one<br>verifier;<br>QA - One<br>reviewer<br>and one<br>verifier               | Clear<br>reasons for<br>not doing<br>meta-<br>analysis |
| Boycott,<br>2012                                                               | Rapid evidence<br>assessment provides an<br>overview of existing<br>research on a specific<br>research topic, as well<br>as a simple extraction<br>and synthesis of the<br>relevant data                                                          | NR | Protocol not<br>mentioned;<br>Research<br>question<br>clearly<br>reported | Searched more<br>than one database;<br>Searched published<br>sources only;<br>Search strategy<br>clearly reported;<br>Yes, references<br>scanned; Yes,<br>authors contacted        | Limited by<br>date; Limited<br>by language;<br>Limited by<br>study design              | L1 - one<br>reviewer<br>and one<br>verifier; L2<br>- Not<br>reported                                      | DA - Done<br>but unclear<br>number of<br>reviewers;<br>QA - Done<br>but unclear<br>number of<br>reviewers | Narrative/d<br>escriptive<br>summary<br>only           |
| Brearley,<br>2011                                                              | No definition                                                                                                                                                                                                                                     | NR | Protocol not<br>mentioned;<br>Research<br>question<br>clearly<br>reported | Searched more<br>than one database;<br>Searched published<br>sources only;<br>Search strategy<br>clearly reported;<br>Reference scanning<br>not reported;                          | Limited by<br>date; Limited<br>by language;<br>Limited by<br>study design              | L1 - two<br>independen<br>t reviewers;<br>L2 - One<br>reviewer<br>and one<br>verifier                     | DA - One<br>reviewer<br>and one<br>verifier;<br>QA - One<br>reviewer<br>and one<br>verifier               | Narrative/d<br>escriptive<br>summary<br>only           |

|               |                                                                                                                                                                                                                                                                                                                                                                                                                             |         |                                                            |                                                                                                                                                                     |                                                                                         |                                                                                      |                                                                                      |                                    |
|---------------|-----------------------------------------------------------------------------------------------------------------------------------------------------------------------------------------------------------------------------------------------------------------------------------------------------------------------------------------------------------------------------------------------------------------------------|---------|------------------------------------------------------------|---------------------------------------------------------------------------------------------------------------------------------------------------------------------|-----------------------------------------------------------------------------------------|--------------------------------------------------------------------------------------|--------------------------------------------------------------------------------------|------------------------------------|
|               |                                                                                                                                                                                                                                                                                                                                                                                                                             |         |                                                            | Contacting authors not reported                                                                                                                                     |                                                                                         |                                                                                      |                                                                                      |                                    |
| Brown, 2008   | No definition                                                                                                                                                                                                                                                                                                                                                                                                               | NR      | Protocol not mentioned; Research question clearly reported | Searched more than one database; Searched published and grey literature; Search strategy unclear; Yes, references scanned; Contacting authors not reported          | Limited by date; Limited by language; No limit on study design                          | L1 - two independent reviewers; L2 - Not reported                                    | DA - Done but unclear number of reviewers; QA - Done but unclear number of reviewers | Narrative/descriptive summary only |
| Brunton, 2013 | A rapid evidence assessment differs from more traditional systematic reviews in that it is conducted within a shorter timeframe, often on focused issues (Gough et al. 2012). However, these differences in methodology used to adapt to the tight timelines must be carefully described and their impact on the findings considered, in order for the research to remain transparent and accountable (Ganann et al. 2010). | 9 weeks | Protocol not mentioned; Research question clearly reported | Searched more than one database; Searched published and grey literature; Search strategy clearly reported; Yes, references scanned; Contacting authors not reported | Limited by date; Limited by language; Limited by study design                           | L1 - two independent reviewers; L2 - Two independent reviewers                       | DA - Two independent reviewers; QA - Two independent reviewers                       | Narrative/descriptive summary only |
| Bryant, 2006  | No definition                                                                                                                                                                                                                                                                                                                                                                                                               | NR      | Protocol not mentioned; Research question clearly reported | Searched one database only; Searched published and grey literature; Search strategy not reported; Reference scanning not reported; Contacting authors               | Limited by date; Language limit unclear/not reported; Study design unclear/not reported | L1 - Done but unclear number of reviewers; L2 - Done but unclear number of reviewers | DA - Not reported; QA - Not reported                                                 | Narrative/descriptive summary only |

|               |                                                                                                                                                                                                       |           |                                                            |                                                                                                                                                                                         |                                                                                         |                                                                                      |                                                                               |                                     |
|---------------|-------------------------------------------------------------------------------------------------------------------------------------------------------------------------------------------------------|-----------|------------------------------------------------------------|-----------------------------------------------------------------------------------------------------------------------------------------------------------------------------------------|-----------------------------------------------------------------------------------------|--------------------------------------------------------------------------------------|-------------------------------------------------------------------------------|-------------------------------------|
|               |                                                                                                                                                                                                       |           |                                                            | not reported                                                                                                                                                                            |                                                                                         |                                                                                      |                                                                               |                                     |
| Bullock, 2010 | No definition                                                                                                                                                                                         | NR        | Protocol not mentioned; Research question clearly reported | Database search not reported; No grey literature mentioned; Search strategy unclear; Reference scanning not reported; Contacting authors not reported                                   | Limited by date; Limited by language; Limited by study design                           | L1 - Done but unclear number of reviewers; L2 - Not reported                         | DA - Done but unclear number of reviewers; QA - One reviewer and one verifier | Narrative/descriptive summary only  |
| Bungay, 2013  | Rapid reviews are literature reviews that are conducted systematically within a limited time frame                                                                                                    | NR        | Protocol not mentioned; Research question clearly reported | Used a previous review(s) as starting point; Searched published and grey literature; Search strategy clearly reported; Reference scanning not reported; Contacting authors not reported | Limited by date; Limited by language; No limit on study design                          | L1 - Done but unclear number of reviewers; L2 - Done but unclear number of reviewers | DA - Done but unclear number of reviewers; QA - One reviewer only             | Narrative/descriptive summary only  |
| Burls, 2002   | Rapid reviews are completed in a limited time to inform the appraisal and guideline development processes. The review brings together evidence on key aspects of the use of the technology concerned. | 4-6 weeks | Protocol not mentioned; Research question clearly reported | Searched more than one database; Searched published and grey literature; Search strategy clearly reported; Yes, references scanned; Contacting authors not reported                     | Limited by date; No Language limit; Limited by study design                             | L1 - two independent reviewers; L2 - Two independent reviewers                       | DA - Two independent reviewers; QA- Two independent reviewers                 | Meta-analysis and narrative summary |
| Butler, 2004  | A systematic assessment of the best available evidence that follows the principles of a systematic review, but concessions are made in order to complete reviews in a shorter time scale. Grey        | 3 months  | Protocol not mentioned; Research question clearly reported | Searched more than one database; Searched published sources only; Search strategy clearly reported; Yes, references scanned; Contacting authors                                         | Limited by date; Language limit unclear/not reported; Study design unclear/not reported | L1 - two independent reviewers; L2 - Two independent reviewers                       | DA - Done but unclear number of reviewers; QA - More than two reviewers       | Narrative/descriptive summary only  |

|                                | literature is not included.                                                                                                                                                                                                                                                                                                                                                                                   |           |                                                            | not reported                                                                                                                                                        |                                                               |                                                                |                                                                               |                                           |
|--------------------------------|---------------------------------------------------------------------------------------------------------------------------------------------------------------------------------------------------------------------------------------------------------------------------------------------------------------------------------------------------------------------------------------------------------------|-----------|------------------------------------------------------------|---------------------------------------------------------------------------------------------------------------------------------------------------------------------|---------------------------------------------------------------|----------------------------------------------------------------|-------------------------------------------------------------------------------|-------------------------------------------|
| Butt, 2010                     | No definition                                                                                                                                                                                                                                                                                                                                                                                                 | NR        | Protocol not mentioned; Research question clearly reported | Searched more than one database; Searched published sources only; Search strategy clearly reported; Yes, references scanned; Yes, authors contacted                 | No Date limit; Limited by language; Limited by study design   | L1 - one reviewer only; L2 - One reviewer only                 | DA - One reviewer only; QA - One reviewer and one verifier                    | Clear reasons for not doing meta-analysis |
| Caird, 2012                    | A systematic rapid evidence assessment (SREA) represents the only way in which a broad policy question may be answered within a tight timescale.                                                                                                                                                                                                                                                              | NR        | Protocol not mentioned; Research question clearly reported | Searched more than one database; Searched published sources only; Search strategy clearly reported; Yes, references scanned; Yes, authors contacted                 | Limited by date; Limited by language; Limited by study design | L1 - Done but unclear number of reviewers; L2 - Not reported   | DA - Done but unclear number of reviewers; QA- Two independent reviewers      | Narrative/descriptive summary only        |
| Cameron, 2007 [CR: Watt 2008b] | Any HTA report or systematic review that has taken between 1-6 months to produce which contains the elements of a comprehensive literature search. The concept of 'rapid review' is increasing, driven primarily by this need to engage with clinicians, consumers and policy makers in a timely manner in order to provide evidence-based recommendations pertaining to healthcare activities and decisions. | < 1 month | Protocol not mentioned; Research question clearly reported | Searched more than one database; Searched published and grey literature; Search strategy clearly reported; Yes, references scanned; Contacting authors not reported | Limited by date; Limited by language; Limited by study design | L1 - two independent reviewers; L2 - Two independent reviewers | DA - One reviewer and one verifier; QA - Done but unclear number of reviewers | Narrative/descriptive summary only        |
| Carr, 2011                     | No definition                                                                                                                                                                                                                                                                                                                                                                                                 | NR        | Yes,                                                       | Searched more                                                                                                                                                       | Limited by                                                    | L1 - two                                                       | DA - Two                                                                      | Narrative/d                               |

|               |               |          |                                                            |                                                                                                                                                                                |                                                                                                         |                                                                           |                                                                                      |                                     |
|---------------|---------------|----------|------------------------------------------------------------|--------------------------------------------------------------------------------------------------------------------------------------------------------------------------------|---------------------------------------------------------------------------------------------------------|---------------------------------------------------------------------------|--------------------------------------------------------------------------------------|-------------------------------------|
|               |               |          | protocol mentioned; Research question clearly reported     | than one database; Searched published and grey literature; Search strategy clearly reported; Yes, references scanned; Contacting authors not reported                          | date; No Language limit; No limit on study design                                                       | independent reviewers; L2 - Two independent reviewers                     | independent reviewers; QA- Two independent reviewers                                 | descriptive summary only            |
| Clark, 2003   | No definition | 3 months | Protocol not mentioned; Research question clearly reported | Searched more than one database; Searched published and grey literature; Search strategy clearly reported; Yes, references scanned; Contacting authors not reported            | No Date limit; No Language limit; No limit on study design                                              | L1 - two independent reviewers; L2 - Two independent reviewers            | DA - Two independent reviewers; QA- Two independent reviewers                        | Meta-analysis and narrative summary |
| Coomber, 2004 | No definition | NR       | Protocol not mentioned; Research question clearly reported | Used a previous review(s) as starting point; Searched published and grey literature; Search strategy clearly reported; Reference scanning not reported; Yes, authors contacted | Data limit unclear/not reported; Language limit unclear/not reported; No limit on study design          | L1 - two independent reviewers; L2 - Done but unclear number of reviewers | DA - Not reported; QA - Not done                                                     | Narrative/descriptive summary only  |
| Cragg, 2008   | No definition | 4 months | Protocol not mentioned; Research question clearly reported | Database search not reported; Searched published and grey literature; Search strategy not reported; Reference scanning not reported; Contacting authors not reported           | Data limit unclear/not reported; Language limit unclear/not reported; Study design unclear/not reported | L1 - not reported; L2 - Not reported                                      | DA - Done but unclear number of reviewers; QA - Done but unclear number of reviewers | Narrative/descriptive summary only  |
| Cummins,      | No definition | NR       | Protocol not                                               | Searched more                                                                                                                                                                  | Data limit                                                                                              | L1 - two                                                                  | DA - Two                                                                             | Narrative/d                         |

|                         |                                                                                            |    |                                                            |                                                                                                                                                                     |                                                                                                |                                                                                      |                                                                                      |                                    |
|-------------------------|--------------------------------------------------------------------------------------------|----|------------------------------------------------------------|---------------------------------------------------------------------------------------------------------------------------------------------------------------------|------------------------------------------------------------------------------------------------|--------------------------------------------------------------------------------------|--------------------------------------------------------------------------------------|------------------------------------|
| 2001                    |                                                                                            |    | mentioned;<br>Research question clearly reported           | than one database; Searched published and grey literature; Search strategy clearly reported; Reference scanning not reported; Contacting authors not reported       | unclear/not reported; No Language limit; Limited by study design                               | independent reviewers; L2 - Not reported                                             | independent reviewers; QA - Done but unclear number of reviewers                     | descriptive summary only           |
| De Laet, 2008           | No definition                                                                              | NR | Protocol not mentioned; Research question clearly reported | Searched more than one database; Searched published and grey literature; Search strategy clearly reported; Yes, references scanned; Contacting authors not reported | Limited by date; Language limit unclear/not reported; Limited by study design                  | L1 - Done but unclear number of reviewers; L2 - Done but unclear number of reviewers | DA - Not reported; QA - Not reported                                                 | Narrative/descriptive summary only |
| Dixon-Woods, 2012       | No definition                                                                              | NR | Protocol not mentioned; Research question clearly reported | Used a previous review(s) as starting point; No Grey literature mentioned; Search strategy not reported; Yes, references scanned; Contacting authors not reported   | Data limit unclear/not reported; Language limit unclear/not reported; No limit on study design | L1 - not reported; L2 - Not reported                                                 | DA - Not reported; QA - Not done                                                     | Narrative/descriptive summary only |
| Doran, 2013             | It is not necessarily a comprehensive review of all literature relating to the topic area. | NR | Protocol not mentioned; Research question clearly reported | Searched more than one database; Searched published and grey literature; Search strategy clearly reported; Yes, references scanned; Yes, authors contacted          | Limited by date; Language limit unclear/not reported; Limited by study design                  | L1 - one reviewer only; L2 - One reviewer only                                       | DA - Done but unclear number of reviewers; QA - Done but unclear number of reviewers | Narrative/descriptive summary only |
| Fitzpatrick-Lewis, 2011 | No definition                                                                              | NR | No protocol published;                                     | Searched more than one database;                                                                                                                                    | Limited by date; Limited                                                                       | L1 - one reviewer                                                                    | DA - One reviewer                                                                    | Narrative/descriptive              |

|                |                                                                                                                                                                                                                                                                             |    |                                                            |                                                                                                                                                                    |                                                                                         |                                                                                      |                                                              |                                    |
|----------------|-----------------------------------------------------------------------------------------------------------------------------------------------------------------------------------------------------------------------------------------------------------------------------|----|------------------------------------------------------------|--------------------------------------------------------------------------------------------------------------------------------------------------------------------|-----------------------------------------------------------------------------------------|--------------------------------------------------------------------------------------|--------------------------------------------------------------|------------------------------------|
|                |                                                                                                                                                                                                                                                                             |    | Research question clearly reported                         | Searched published and grey literature; Search strategy clearly reported; Yes, references scanned; Contacting authors not reported                                 | by language; Limited by study design                                                    | and one verifier; L2 - Two independent reviewers                                     | and one verifier; QA- Two independent reviewers              | summary only                       |
| Foerster, 2007 | The report is based on a limited literature search and is not comprehensive, systematic reviews. The intent is to provide a list of sources and a summary of the best evidence on the topic that CADTH could identify using all reasonable efforts within the time allowed. | NR | Protocol not mentioned; Research question clearly reported | Searched more than one database; Searched published and grey literature; Search strategy unclear; Reference scanning not reported; Contacting authors not reported | Limited by date; Limited by language; Study design unclear/not reported                 | L1 - Done but unclear number of reviewers; L2 - Done but unclear number of reviewers | DA - Done but unclear number of reviewers; QA - Not done     | Narrative/descriptive summary only |
| Geddes, 2011   | No definition                                                                                                                                                                                                                                                               | NR | Protocol not mentioned; Research question clearly reported | Searched more than one database; Searched published and grey literature; Search strategy unclear; Reference scanning not reported; Contacting authors not reported | Limited by date; Language limit unclear/not reported; Limited by study design           | L1 - not reported; L2 - Not reported                                                 | DA - Not reported; QA - Done but unclear number of reviewers | Narrative/descriptive summary only |
| Hildon, 2012   | No definition                                                                                                                                                                                                                                                               | NR | Protocol not mentioned; Research question clearly reported | Searched more than one database; Searched published and grey literature; Search strategy clearly reported; Reference scanning not reported;                        | Data limit unclear/not reported; Limited by language; Study design unclear/not reported | L1 - Done but unclear number of reviewers; L2 - Done but unclear number of reviewers | DA - Done but unclear number of reviewers; QA - Not done     | Narrative/descriptive summary only |

|                   |                                                                                                                                                                                         |    |                                                            |                                                                                                                                                                             |                                                                                                         |                                                                                      |                                                                                      |                                         |
|-------------------|-----------------------------------------------------------------------------------------------------------------------------------------------------------------------------------------|----|------------------------------------------------------------|-----------------------------------------------------------------------------------------------------------------------------------------------------------------------------|---------------------------------------------------------------------------------------------------------|--------------------------------------------------------------------------------------|--------------------------------------------------------------------------------------|-----------------------------------------|
|                   |                                                                                                                                                                                         |    |                                                            | Contacting authors not reported                                                                                                                                             |                                                                                                         |                                                                                      |                                                                                      |                                         |
| Hulstaert, 2009   | No definition                                                                                                                                                                           | NR | Protocol not mentioned; Research question clearly reported | Searched more than one database; Searched published and grey literature; Search strategy clearly reported; Reference scanning not reported; Contacting authors not reported | Limited by date; Language limit unclear/not reported; Limited by study design                           | L1 - Done but unclear number of reviewers; L2 - Not reported                         | DA - Not done; QA - Not done                                                         | Narrative/d escriptive summary only     |
| Jahangirian, 2011 | No definition                                                                                                                                                                           | NR | Protocol not mentioned; Research question clearly reported | Searched more than one database; Searched published and grey literature; Search strategy unclear; Reference scanning not reported; Contacting authors not reported          | Data limit unclear/not reported; Language limit unclear/not reported; Study design unclear/not reported | L1 - not reported; L2 - Not reported                                                 | DA - Done but unclear number of reviewers; QA - Not reported                         | Unclear/li mited data synthesis methods |
| Joliffe, 2007     | The main difference between a systematic review and a REA is the restriction of the time period available to search for eligible studies                                                | NR | Protocol not mentioned; Research question clearly reported | Searched more than one database; Searched published and grey literature; Search strategy not reported; Reference scanning not reported; Yes, authors contacted              | Data limit unclear/not reported; Limited by language; Study design unclear/not reported                 | L1 - Done but unclear number of reviewers; L2 - Done but unclear number of reviewers | DA - Not reported; QA - Not reported                                                 | Meta-analysis and narrative summary     |
| Kelly, 2011       | Rapid reviews are a new and contentious approach to knowledge transfer and exchange between researchers and policy makers. They are typically conducted in months rather than years and | NR | Protocol not mentioned; Research question clearly reported | Searched more than one database; Searched published and grey literature; Search strategy clearly reported; Yes, references scanned; Contacting authors                      | Limited by date; Language limit unclear/not reported; Study design unclear/not reported                 | L1 - one reviewer and one verifier; L2 - Not reported                                | DA - Done but unclear number of reviewers; QA - Done but unclear number of reviewers | Narrative/d escriptive summary only     |

|               |                                                                                                                                                                                                                                                                               |         |                                                            |                                                                                                                                                                             |                                                                         |                                                                           |                                                |                                           |
|---------------|-------------------------------------------------------------------------------------------------------------------------------------------------------------------------------------------------------------------------------------------------------------------------------|---------|------------------------------------------------------------|-----------------------------------------------------------------------------------------------------------------------------------------------------------------------------|-------------------------------------------------------------------------|---------------------------------------------------------------------------|------------------------------------------------|-------------------------------------------|
|               | the focus is determined by policy-makers rather than researchers. The strength of a rapid review lies in its timeliness and responsiveness to the needs of policy makers and practitioners, but its limitations include the reliability and generalisability of the findings. |         |                                                            | not reported                                                                                                                                                                |                                                                         |                                                                           |                                                |                                           |
| Konnyu, 2012  | Rapid reviews have emerged as a streamlined approach to synthesizing evidence quickly, typically for the purpose of helping decision-makers in health care and health services settings respond in a timely manner to urgent and emerging needs                               | 1 month | Protocol not mentioned; Research question clearly reported | Searched more than one database; Searched published and grey literature; Search strategy clearly reported; Yes, references scanned; Contacting authors not reported         | Limited by date; Limited by language; Limited by study design           | L1 - two independent reviewers; L2 - Done but unclear number of reviewers | DA - One reviewer only; QA - One reviewer only | Clear reasons for not doing meta-analysis |
| Legrand, 2008 | No definition                                                                                                                                                                                                                                                                 | NR      | Protocol not mentioned; Research question clearly reported | Searched more than one database; Searched published and grey literature; Search strategy clearly reported; Reference scanning not reported; Contacting authors not reported | Limited by date; Limited by language; Study design unclear/not reported | L1 - two independent reviewers; L2 - Done but unclear number of reviewers | DA - Not reported; QA - Not reported           | Narrative/descriptive summary only        |
| Lewis, 2001   |                                                                                                                                                                                                                                                                               | NR      | Protocol not mentioned; Research question clearly          | Searched more than one database; Searched published and grey literature; Search strategy                                                                                    | No Date limit; Limited by language; Limited by study design             | L1 - two independent reviewers; L2 - Two independent                      | DA - One reviewer and one verifier; QA- Two    | Meta-analysis and narrative summary       |

|                  |                                                                                                                                                                                                                                                                                                                                                                                                                                                            |    |                                                                           |                                                                                                                                                                                                |                                                                           |                                                                                 |                                                                                              |                                              |
|------------------|------------------------------------------------------------------------------------------------------------------------------------------------------------------------------------------------------------------------------------------------------------------------------------------------------------------------------------------------------------------------------------------------------------------------------------------------------------|----|---------------------------------------------------------------------------|------------------------------------------------------------------------------------------------------------------------------------------------------------------------------------------------|---------------------------------------------------------------------------|---------------------------------------------------------------------------------|----------------------------------------------------------------------------------------------|----------------------------------------------|
|                  |                                                                                                                                                                                                                                                                                                                                                                                                                                                            |    | reported                                                                  | clearly reported;<br>Yes, references<br>scanned;<br>Contacting authors<br>not reported                                                                                                         |                                                                           | t reviewers                                                                     | independen<br>t reviewers                                                                    |                                              |
| Low, 2006        | No definition                                                                                                                                                                                                                                                                                                                                                                                                                                              | NR | Protocol not<br>mentioned;<br>Research<br>question<br>clearly<br>reported | Searched more<br>than one database;<br>Searched published<br>and grey literature;<br>Search strategy<br>clearly reported;<br>Yes, references<br>scanned;<br>Contacting authors<br>not reported | Limited by<br>date; No<br>Language limit;<br>No limit on<br>study design  | L1 - two<br>independen<br>t reviewers;<br>L2 - Two<br>independen<br>t reviewers | DA - Two<br>independen<br>t reviewers;<br>QA - Done<br>but unclear<br>number of<br>reviewers | Narrative/d<br>escriptive<br>summary<br>only |
| Maddern,<br>[NR] | A rapid systematic<br>review in which the<br>methodology has been<br>limited in one or more<br>areas to shorten the<br>timeline for its<br>completion. This rapid<br>review is a limited<br>evidence-based<br>assessment that is based<br>on a simple systematic<br>search of studies<br>published in the peer<br>reviewed literature. As<br>a result, this rapid<br>review may be used to<br>inform certain questions<br>on the specific review<br>topic. | NR | Protocol not<br>mentioned;<br>Research<br>question<br>clearly<br>reported | Searched more<br>than one database;<br>Searched published<br>sources only;<br>Search strategy<br>clearly reported;<br>No references<br>scanned; No<br>authors contacted                        | Limited by<br>date; Limited<br>by language;<br>Limited by<br>study design | L1 - one<br>reviewer<br>only; L2 -<br>One<br>reviewer<br>only                   | DA - One<br>reviewer<br>and one<br>verifier;<br>QA - One<br>reviewer<br>and one<br>verifier  | Narrative/d<br>escriptive<br>summary<br>only |
| Maddern,<br>[NR] | A rapid systematic<br>review in which the<br>methodology has been<br>limited in one or more<br>areas to shorten the<br>timeline for its                                                                                                                                                                                                                                                                                                                    | NR | Protocol not<br>mentioned;<br>Research<br>question<br>clearly<br>reported | Searched more<br>than one database;<br>Searched published<br>sources only;<br>Search strategy<br>clearly reported;                                                                             | Limited by<br>date; Limited<br>by language;<br>Limited by<br>study design | L1 - one<br>reviewer<br>only; L2 -<br>One<br>reviewer<br>only                   | DA - One<br>reviewer<br>and one<br>verifier;<br>QA - One<br>reviewer                         | Narrative/d<br>escriptive<br>summary<br>only |

|               |                                                                                                                                                                                                                                                                                                                                                                                                      |    |                                                            |                                                                                                                                                 |                                                               |                                                |                                                                        |                                     |
|---------------|------------------------------------------------------------------------------------------------------------------------------------------------------------------------------------------------------------------------------------------------------------------------------------------------------------------------------------------------------------------------------------------------------|----|------------------------------------------------------------|-------------------------------------------------------------------------------------------------------------------------------------------------|---------------------------------------------------------------|------------------------------------------------|------------------------------------------------------------------------|-------------------------------------|
|               | completion. This rapid review is a limited evidence-based assessment that is based on a simple systematic search of studies published in the peer reviewed literature. As a result, this rapid review may be used to inform certain questions on the specific review topic.                                                                                                                          |    |                                                            | No references scanned; No authors contacted                                                                                                     |                                                               |                                                | and one verifier                                                       |                                     |
| Maddern, [NR] | A rapid systematic review in which the methodology has been limited in one or more areas to shorten the timeline for its completion. This rapid review is a limited evidence-based assessment that is based on a simple systematic search of studies published in the peer reviewed literature. As a result, this rapid review may be used to inform certain questions on the specific review topic. | NR | Protocol not mentioned; Research question clearly reported | Searched more than one database; Searched published sources only; Search strategy clearly reported; No references scanned; No authors contacted | Limited by date; Limited by language; Limited by study design | L1 - one reviewer only; L2 - One reviewer only | DA - One reviewer and one verifier; QA - One reviewer and one verifier | Narrative/d escriptive summary only |
| Maddern, [NR] | A rapid systematic review in which the methodology has been limited in one or more areas to shorten the timeline for its completion. This rapid review is a limited                                                                                                                                                                                                                                  | NR | Protocol not mentioned; Research question clearly reported | Searched more than one database; Searched published sources only; Search strategy clearly reported; No references scanned; No                   | No Date limit; Limited by language; Limited by study design   | L1 - one reviewer only; L2 - One reviewer only | DA - One reviewer and one verifier; QA - One reviewer and one verifier | Narrative/d escriptive summary only |

|               |                                                                                                                                                                                                                                                                                                                                                                                                      |    |                                                            |                                                                                                                                                                     |                                                               |                                                                                      |                                                                                      |                                     |
|---------------|------------------------------------------------------------------------------------------------------------------------------------------------------------------------------------------------------------------------------------------------------------------------------------------------------------------------------------------------------------------------------------------------------|----|------------------------------------------------------------|---------------------------------------------------------------------------------------------------------------------------------------------------------------------|---------------------------------------------------------------|--------------------------------------------------------------------------------------|--------------------------------------------------------------------------------------|-------------------------------------|
|               | evidence-based assessment that is based on a simple systematic search of studies published in the peer reviewed literature. As a result, this rapid review may be used to inform certain questions on the specific review topic.                                                                                                                                                                     |    |                                                            | authors contacted                                                                                                                                                   |                                                               |                                                                                      |                                                                                      |                                     |
| Maddern, 2008 | A rapid systematic review in which the methodology has been limited in one or more areas to shorten the timeline for its completion. This rapid review is a limited evidence-based assessment that is based on a simple systematic search of studies published in the peer reviewed literature. As a result, this rapid review may be used to inform certain questions on the specific review topic. | NR | Protocol not mentioned; Research question clearly reported | Searched more than one database; Searched published sources only; Search strategy clearly reported; No references scanned; No authors contacted                     | Limited by date; Limited by language; Limited by study design | L1 - one reviewer only; L2 - One reviewer only                                       | DA - One reviewer and one verifier; QA - One reviewer and one verifier               | Narrative/d escriptive summary only |
| Mann, 2011    | No definition                                                                                                                                                                                                                                                                                                                                                                                        | NR | Protocol not mentioned; Research question clearly reported | Searched more than one database; Searched published and grey literature; Search strategy clearly reported; Yes, references scanned; Contacting authors not reported | Limited by date; Limited by language; Limited by study design | L1 - Done but unclear number of reviewers; L2 - Done but unclear number of reviewers | DA - Done but unclear number of reviewers; QA - Done but unclear number of reviewers | Narrative/d escriptive summary only |

|                 |                                                                                                                                                                                                                                          |    |                                                            |                                                                                                                                                                             |                                                                |                                                                |                                                                                      |                                           |
|-----------------|------------------------------------------------------------------------------------------------------------------------------------------------------------------------------------------------------------------------------------------|----|------------------------------------------------------------|-----------------------------------------------------------------------------------------------------------------------------------------------------------------------------|----------------------------------------------------------------|----------------------------------------------------------------|--------------------------------------------------------------------------------------|-------------------------------------------|
| Marsh, 2008     | No definition                                                                                                                                                                                                                            | NR | Protocol not mentioned; Research question clearly reported | Searched more than one database; Searched published sources only; Search strategy clearly reported; Reference scanning not reported; Contacting authors not reported        | Limited by date; Limited by language; Limited by study design  | L1 - two independent reviewers; L2 - Two independent reviewers | DA - Done but unclear number of reviewers; QA - Done but unclear number of reviewers | Meta-analysis and narrative summary       |
| Mcmurran, 2012  | A briefer version of a full systematic review, devised originally for informing policy decision-making quickly                                                                                                                           | NR | Protocol not mentioned; Research question clearly reported | Searched more than one database; Searched published and grey literature; Search strategy clearly reported; Reference scanning not reported; Yes, authors contacted          | Limited by date; Limited by language; Limited by study design  | L1 - one reviewer only; L2 - One reviewer only                 | DA - One reviewer only; QA - One reviewer only                                       | Narrative/descriptive summary only        |
| McRobbie, 2006  | No definition                                                                                                                                                                                                                            | NR | Protocol not mentioned; Research question clearly reported | Searched more than one database; Searched published and grey literature; Search strategy clearly reported; Reference scanning not reported; Contacting authors not reported | Limited by date; Limited by language; No limit on study design | L1 - one reviewer only; L2 - Two independent reviewers         | DA - Done but unclear number of reviewers; QA - Done but unclear number of reviewers | Meta-analysis and narrative summary       |
| Middleton, 2003 | Accelerated systematic reviews are produced in response to a pressing need for a systematic summary and appraisal of the available literature for a new or emerging surgical procedure. They use the same methodology as full systematic | NR | Protocol not mentioned; Research question clearly reported | Searched more than one database; Searched published sources only; Search strategy clearly reported; Reference scanning not reported; Contacting authors not reported        | No Date limit; No Language limit; Limited by study design      | L1 - not reported; L2 - Not reported                           | DA - One reviewer and one verifier; QA - Done but unclear number of reviewers        | Clear reasons for not doing meta-analysis |

|                |                                                                                                                                                                                                                                                                                                                                                                                                                                             |          |                                                            |                                                                                                                                                             |                                                                                               |                                                                                      |                                                              |                                    |
|----------------|---------------------------------------------------------------------------------------------------------------------------------------------------------------------------------------------------------------------------------------------------------------------------------------------------------------------------------------------------------------------------------------------------------------------------------------------|----------|------------------------------------------------------------|-------------------------------------------------------------------------------------------------------------------------------------------------------------|-----------------------------------------------------------------------------------------------|--------------------------------------------------------------------------------------|--------------------------------------------------------------|------------------------------------|
|                | reviews, but may restrict the types of studies considered (for example, by only including comparative studies and not case series) in order to produce the review in a shorter time period than a full systematic review.                                                                                                                                                                                                                   |          |                                                            |                                                                                                                                                             |                                                                                               |                                                                                      |                                                              |                                    |
| Mitchell, 2011 | Expedited production of short-form evidence inventory reports. In an evidence inventory report the authors leave the 'patient' element of PICO unspecified and then assess how much evidence there is for the intervention in question, stratifying by patient group. The inventory process would work equally well assessing the quantity of evidence on different variations of a particular intervention for a particular patient group. | 3-4 days | Protocol not mentioned; Research question clearly reported | Searched more than one database; Searched published sources only; Search strategy unclear; Reference scanning not reported; Contacting authors not reported | Data limit unclear/not reported; Language limit unclear/not reported; Limited by study design | L1 - Done but unclear number of reviewers; L2 - Done but unclear number of reviewers | DA - Done but unclear number of reviewers; QA - Not reported | Narrative/descriptive summary only |
| Moran, 2011    | No definition                                                                                                                                                                                                                                                                                                                                                                                                                               | NR       | Protocol not mentioned; Research question clearly reported | Searched more than one database; Searched published and grey literature; Search strategy not reported; Reference scanning not reported; Contacting authors  | Limited by date; Language limit unclear/not reported; Study design unclear/not reported       | L1 - not reported; L2 - Not reported                                                 | DA - Not reported; QA - Not reported                         | Narrative/descriptive summary only |

|                |                                                                                                                                                                              |           |                                                            |                                                                                                                                                                     |                                                                                |                                                                |                                                                   |                                     |
|----------------|------------------------------------------------------------------------------------------------------------------------------------------------------------------------------|-----------|------------------------------------------------------------|---------------------------------------------------------------------------------------------------------------------------------------------------------------------|--------------------------------------------------------------------------------|----------------------------------------------------------------|-------------------------------------------------------------------|-------------------------------------|
|                |                                                                                                                                                                              |           |                                                            | not reported                                                                                                                                                        |                                                                                |                                                                |                                                                   |                                     |
| Murphy, 2010   | No definition                                                                                                                                                                | NR        | Protocol not mentioned; Research question clearly reported | Searched more than one database; Searched published and grey literature; Search strategy clearly reported; Yes, references scanned; Contacting authors not reported | Limited by date; Limited by language; Limited by study design                  | L1 - one reviewer only; L2 - One reviewer and one verifier     | DA - Not reported; QA - Not reported                              | Narrative/d escriptive summary only |
| Nasser, 2011   | No definition                                                                                                                                                                | NR        | Protocol not mentioned; Research question clearly reported | Searched more than one database; No Grey literature mentioned; Search strategy clearly reported; Reference scanning not reported; Contacting authors not reported   | Limited by date; Language limit unclear/not reported; No limit on study design | L1 - not reported; L2 - Not reported                           | DA - Not reported; QA - Not reported                              | Narrative/d escriptive summary only |
| Ndegwa, 2010   | No definition                                                                                                                                                                | NR        | Protocol not mentioned; Research question clearly reported | Searched more than one database; Searched published and grey literature; Search strategy clearly reported; Yes, references scanned; Contacting authors not reported | Limited by date; Limited by language; No limit on study design                 | L1 - one reviewer only; L2 - One reviewer and one verifier     | DA - Not reported; QA - Not reported                              | Narrative/d escriptive summary only |
| O' Meara, 2001 | Reviews in Health Technology Assessment are termed systematic when the account of the search appraisal and synthesis methods would, in theory, permit the replication of the | 11 months | Protocol not mentioned; Research question clearly reported | Searched more than one database; Searched published and grey literature; Search strategy clearly reported; Yes, references scanned; Yes, authors contacted          | No Date limit; Limited by language; Limited by study design                    | L1 - two independent reviewers; L2 - Two independent reviewers | DA - One reviewer and one verifier; QA- Two independent reviewers | Meta-analysis and narrative summary |

|                  |                                                                                                                                                                                                                                          |    |                                                               |                                                                                                                                                                                             |                                                                                            |                                                                                         |                                                                                         |                                     |
|------------------|------------------------------------------------------------------------------------------------------------------------------------------------------------------------------------------------------------------------------------------|----|---------------------------------------------------------------|---------------------------------------------------------------------------------------------------------------------------------------------------------------------------------------------|--------------------------------------------------------------------------------------------|-----------------------------------------------------------------------------------------|-----------------------------------------------------------------------------------------|-------------------------------------|
|                  | review by others.<br>Rapid reviews are completed in a limited time to inform the appraisal and guideline development processes managed by NICE.                                                                                          |    |                                                               |                                                                                                                                                                                             |                                                                                            |                                                                                         |                                                                                         |                                     |
| Obyn, 2008       | No definition                                                                                                                                                                                                                            | NR | Protocol not mentioned;<br>Research question clearly reported | Used a previous review(s) as starting point;<br>Searched published and grey literature;<br>Search strategy clearly reported;<br>Yes, references scanned;<br>Contacting authors not reported | Limited by date; Limited by language;<br>No limit on study design                          | L1 - Done but unclear number of reviewers;<br>L2 - Done but unclear number of reviewers | DA - Done but unclear number of reviewers;<br>QA - Done but unclear number of reviewers | Narrative/d escriptive summary only |
| Phillipson, 2012 | This evidence check review was produced using the evidence check methodology in response to specific questions from the commissioning agency. It is not necessarily a comprehensive review of all literature relating to the topic area. | NR | Protocol not mentioned;<br>Research question clearly reported | Searched more than one database;<br>Searched published and grey literature;<br>Search strategy clearly reported;<br>Yes, references scanned;<br>Contacting authors not reported             | Limited by date; Language limit<br>unclear/not reported; Study design unclear/not reported | L1 - Done but unclear number of reviewers;<br>L2 - Done but unclear number of reviewers | DA - Done but unclear number of reviewers;<br>QA - Done but unclear number of reviewers | Narrative/d escriptive summary only |
| Rissel, 2012     | This evidence check review was produced using the evidence check methodology in response to specific questions from the commissioning agency. It is not necessarily a comprehensive review of all literature relating to the topic area. | NR | Protocol not mentioned;<br>Research question clearly reported | Searched more than one database;<br>Searched published and grey literature;<br>Search strategy clearly reported;<br>Yes, references scanned;<br>Contacting authors not reported             | Limited by date; Limited by language;<br>Study design unclear/not reported                 | L1 - Done but unclear number of reviewers;<br>L2 - Not done                             | DA - Done but unclear number of reviewers;<br>QA - Not reported                         | Narrative/d escriptive summary only |

|                       |               |          |                                                            |                                                                                                                                                                                         |                                                                               |                                                                |                                                                   |                                           |
|-----------------------|---------------|----------|------------------------------------------------------------|-----------------------------------------------------------------------------------------------------------------------------------------------------------------------------------------|-------------------------------------------------------------------------------|----------------------------------------------------------------|-------------------------------------------------------------------|-------------------------------------------|
| Saborido, 2010        | No definition | 4 months | Protocol not mentioned; Research question clearly reported | Used a previous review(s) as starting point; Searched published and grey literature; Search strategy clearly reported; Yes, references scanned; Contacting authors not reported         | No Date limit; Limited by language; No limit on study design                  | L1 - two independent reviewers; L2 - Two independent reviewers | DA - One reviewer and one verifier; QA - Not done                 | Narrative/descriptive summary only        |
| Schnell-Inderst, 2011 | No definition | NR       | Protocol not mentioned; Research question clearly reported | Used a previous review(s) as starting point; Searched published and grey literature; Search strategy clearly reported; Reference scanning not reported; Contacting authors not reported | Limited by date; Language limit unclear/not reported; Limited by study design | L1 - two independent reviewers; L2 - Two independent reviewers | DA - Two independent reviewers; QA- Two independent reviewers     | Narrative/descriptive summary only        |
| Singh, 2005           | No definition | NR       | Protocol not mentioned; Research question clearly reported | Searched more than one database; Searched published and grey literature; Search strategy not reported; Yes, references scanned; Yes, authors contacted                                  | Limited by date; No Language limit; No limit on study design                  | L1 - two independent reviewers; L2 - Two independent reviewers | DA - One reviewer and one verifier; QA- Two independent reviewers | Narrative/descriptive summary only        |
| Singh, 2006           | No definition | NR       | Protocol not mentioned; Research question clearly reported | Searched more than one database; Searched published and grey literature; Search strategy clearly reported; Yes, references scanned; Yes, authors contacted                              | Limited by date; No Language limit; No limit on study design                  | L1 - two independent reviewers; L2 - Two independent reviewers | DA - One reviewer and one verifier; QA - Not reported             | Clear reasons for not doing meta-analysis |

|                |                                                                                                                                                                                                                                                                                 |         |                                                               |                                                                                                                                                                                             |                                                                  |                                                                   |                                                                   |                                           |
|----------------|---------------------------------------------------------------------------------------------------------------------------------------------------------------------------------------------------------------------------------------------------------------------------------|---------|---------------------------------------------------------------|---------------------------------------------------------------------------------------------------------------------------------------------------------------------------------------------|------------------------------------------------------------------|-------------------------------------------------------------------|-------------------------------------------------------------------|-------------------------------------------|
| Singh, 2006    | No definition                                                                                                                                                                                                                                                                   | 3 weeks | Protocol not mentioned;<br>Research question clearly reported | Searched more than one database;<br>Searched published and grey literature;<br>Search strategy clearly reported;<br>Yes, references scanned; Yes, authors contacted                         | Limited by date; No Language limit;<br>No limit on study design  | L1 - one reviewer only; L2 - One reviewer only                    | DA - One reviewer only; QA - One reviewer only                    | Clear reasons for not doing meta-analysis |
| Smith, 2013    | Rapid structured reviews are used to summarize and synthesis research findings within the constraints of a given timetable and resources and differ from systematic review in relation to the extensiveness of the literature search and methods used to undertake the analysis | NR      | Protocol not mentioned;<br>Research question clearly reported | Searched more than one database;<br>Searched published and grey literature;<br>Search strategy clearly reported;<br>Yes, references scanned; Yes, authors contacted                         | Limited by date; Limited by language;<br>Limited by study design | L1 - one reviewer only; L2 - Done but unclear number of reviewers | DA - Not reported; QA - Done but unclear number of reviewers      | Narrative/d escriptive summary only       |
| Stordeur, 2009 | No definition                                                                                                                                                                                                                                                                   | NR      | Protocol not mentioned;<br>Research question clearly reported | Used a previous review(s) as starting point;<br>Searched published and grey literature;<br>Search strategy clearly reported;<br>Yes, references scanned;<br>Contacting authors not reported | Limited by date; No Language limit;<br>No limit on study design  | L1 - two independent reviewers; L2 - Two independent reviewers    | DA - Done but unclear number of reviewers; QA - One reviewer only | Narrative/d escriptive summary only       |
| Sutton, 2011   | Rapid reviews, by their very nature, are constrained by time, and this impact on the completeness of searching undertaken                                                                                                                                                       | NR      | Protocol not mentioned;<br>Research question clearly reported | Searched more than one database;<br>Searched published sources only;<br>Search strategy clearly reported;                                                                                   | Limited by date; Limited by language;<br>Limited by study design | L1 - Done but unclear number of reviewers; L2 - Done but unclear  | DA - Not reported; QA - Not reported                              | Narrative/d escriptive summary only       |

|                                        |                                                                                                                                                                                                                                                                                                                                                                                                      |              |                                                               |                                                                                                                                                        |                                                                                                         |                                                                |                                                                        |                                           |
|----------------------------------------|------------------------------------------------------------------------------------------------------------------------------------------------------------------------------------------------------------------------------------------------------------------------------------------------------------------------------------------------------------------------------------------------------|--------------|---------------------------------------------------------------|--------------------------------------------------------------------------------------------------------------------------------------------------------|---------------------------------------------------------------------------------------------------------|----------------------------------------------------------------|------------------------------------------------------------------------|-------------------------------------------|
|                                        | and the depth of formal quality assessment. Nonetheless, this type of review can provide a general indication of the overall quality and direction of effect reported in the literature.                                                                                                                                                                                                             |              |                                                               | Yes, references scanned;<br>Contacting authors not reported                                                                                            |                                                                                                         | number of reviewers                                            |                                                                        |                                           |
| Thavaneswaran, 2009                    | A rapid systematic review in which the methodology has been limited in one or more areas to shorten the timeline for its completion. This rapid review is a limited evidence-based assessment that is based on a simple systematic search of studies published in the peer reviewed literature. As a result, this rapid review may be used to inform certain questions on the specific review topic. | NR           | Protocol not mentioned;<br>Research question clearly reported | Searched more than one database; Searched published and grey literature; Search strategy clearly reported; No references scanned; No authors contacted | Limited by date; Limited by language; Limited by study design                                           | L1 - two independent reviewers; L2 - Two independent reviewers | DA - One reviewer and one verifier; QA - One reviewer and one verifier | Clear reasons for not doing meta-analysis |
| The Medical Advisory Secretariat, 2010 | No definition                                                                                                                                                                                                                                                                                                                                                                                        | NR           | Protocol not mentioned;<br>Research question clearly reported | Database search not reported; No Grey literature mentioned; Search strategy unclear; Yes, references scanned; Contacting authors not reported          | Data limit unclear/not reported; Language limit unclear/not reported; Study design unclear/not reported | L1 - not reported; L2 - Not reported                           | DA - Not reported; QA - Not reported                                   | Narrative/descriptive summary only        |
| Thigpen, 2012                          | The Rapid Synthesis and Translation Program is                                                                                                                                                                                                                                                                                                                                                       | 10-12 months | Protocol not mentioned;<br>Research                           | Database search not reported; No Grey literature                                                                                                       | Data limit unclear/not reported;                                                                        | L1 - Done but unclear number of                                | DA - Not reported; QA - Not                                            | Unclear/limited data synthesis            |

|                |                                                                                                                                                                                                                                                                                                                                                                                        |          |                                                             |                                                                                                                                                                         |                                                                        |                                                            |                                                                |                                        |
|----------------|----------------------------------------------------------------------------------------------------------------------------------------------------------------------------------------------------------------------------------------------------------------------------------------------------------------------------------------------------------------------------------------|----------|-------------------------------------------------------------|-------------------------------------------------------------------------------------------------------------------------------------------------------------------------|------------------------------------------------------------------------|------------------------------------------------------------|----------------------------------------------------------------|----------------------------------------|
|                | collaborative and by using Lomas' exchange model of knowledge transfer bridges the gap between research and practice by keeping researchers and practitioners involved from the beginning. The RSTP borrows from other policy and science synthesis and translation literature much of which is related to knowledge transfer includes processes or components related to translation. |          | question clearly reported                                   | mentioned; Search strategy not reported; Reference scanning not reported; Contacting authors not reported                                                               | Language limit unclear/not reported; Study design unclear/not reported | reviewers; L2 - Done but unclear number of reviewers       | reported                                                       | methods                                |
| Tripney, 2011  | No definition                                                                                                                                                                                                                                                                                                                                                                          | 6 months | Yes, protocol mentioned; Research question clearly reported | Searched more than one database; Searched published and grey literature; Search strategy clearly reported; Yes, references scanned; Yes, authors contacted              | Limited by date; Limited by language; No limit on study design         | L1 - one reviewer only; L2 - One reviewer and one verifier | DA - Two independent reviewers; QA - Two independent reviewers | Unclear/limited data synthesis methods |
| Tsakonas, 2008 | HTIS responses are based on a limited literature search and are not comprehensive, systematic reviews. The intent is to provide a list of sources and a summary of the best evidence on the topic that CADTH could identify using all reasonable efforts                                                                                                                               | NR       | Protocol not mentioned; Research question clearly reported  | Searched more than one database; Searched published and grey literature; Search strategy not reported; Reference scanning not reported; Contacting authors not reported | Limited by date; Limited by language; Limited by study design          | L1 - two independent reviewers; L2 - Not reported          | DA - Not reported; QA - Done but unclear number of reviewers   | Narrative/descriptive summary only     |

within the time allowed. HTIS responses should be considered along with other types of information and health care considerations. The information included in this response is not intended to replace professional medical advice, nor should it be construed as a recommendation for or against the use of a particular health technology.

|                   |               |    |                                                            |                                                                                                                                                                    |                                                                                                         |                                                                                      |                                                                                      |                                    |
|-------------------|---------------|----|------------------------------------------------------------|--------------------------------------------------------------------------------------------------------------------------------------------------------------------|---------------------------------------------------------------------------------------------------------|--------------------------------------------------------------------------------------|--------------------------------------------------------------------------------------|------------------------------------|
| Van Brabant, 2009 | No definition | NR | Protocol not mentioned; Research question clearly reported | Searched more than one database; Searched published and grey literature; Search strategy clearly reported; Reference scanning not reported; Yes, authors contacted | Data limit unclear/not reported; Language limit unclear/not reported; Study design unclear/not reported | L1 - not reported; L2 - Not reported                                                 | DA - Done but unclear number of reviewers; QA - Done but unclear number of reviewers | Narrative/descriptive summary only |
| Van Brabant, 2008 | No definition | NR | Protocol not mentioned; Research question clearly reported | Used a previous review(s) as starting point; Searched published and grey literature; Search strategy clearly reported; No references scanned; No authors contacted | No Date limit; No Language limit; No limit on study design                                              | L1 - Done but unclear number of reviewers; L2 - Done but unclear number of reviewers | DA - Done but unclear number of reviewers; QA - Not reported                         | Narrative/descriptive summary only |
| Vlaeyen, 2006     | No definition | NR | Protocol not mentioned; Research question                  | Searched more than one database; Searched published and grey literature;                                                                                           | Limited by date; No Language limit; Limited by                                                          | L1 - one reviewer only; L2 - Done but                                                | DA - Done but unclear number of reviewers;                                           | Meta-analysis and narrative        |

|            |                                                                                                                                                                                                                 |            |                                                            |                                                                                                                                                                             |                                                                                                         |                                                                                      |                                                                         |                                    |
|------------|-----------------------------------------------------------------------------------------------------------------------------------------------------------------------------------------------------------------|------------|------------------------------------------------------------|-----------------------------------------------------------------------------------------------------------------------------------------------------------------------------|---------------------------------------------------------------------------------------------------------|--------------------------------------------------------------------------------------|-------------------------------------------------------------------------|------------------------------------|
|            |                                                                                                                                                                                                                 |            | clearly reported                                           | Search strategy clearly reported; Reference scanning not reported; Yes, authors contacted                                                                                   | study design                                                                                            | unclear number of reviewers                                                          | QA - One reviewer and one verifier                                      | summary                            |
| WHO, 2006  | No definition                                                                                                                                                                                                   | 6 months   | Protocol not mentioned; Research question clearly reported | Searched more than one database; Searched published sources only; Search strategy clearly reported; Yes, references scanned; Contacting authors not reported                | Limited by date; Language limit unclear/not reported; Limited by study design                           | L1 - two independent reviewers; L2 - Two independent reviewers                       | DA - One reviewer and one verifier; QA - Two independent reviewers      | Narrative/descriptive summary only |
| York, 2011 | The Rapid Evidence Assessment of the Literature approach differs from a conventional systematic literature review in that a REAL provides an evidence-based, systematic “snapshot” of the available literature. | NR         | Protocol not mentioned; Research question clearly reported | Searched more than one database; Searched published and grey literature; Search strategy clearly reported; Reference scanning not reported; Contacting authors not reported | No Date limit; Limited by language; No limit on study design                                            | L1 - More than two reviewers; L2 - Done but unclear number of reviewers              | DA - Done but unclear number of reviewers; QA - More than two reviewers | Narrative/descriptive summary only |
|            |                                                                                                                                                                                                                 | 8-12 weeks | Protocol not mentioned; Research question clearly reported | Searched more than one database; Searched published sources only; Search strategy clearly reported; No references scanned; No authors contacted                             | Data limit unclear/not reported; Language limit unclear/not reported; Study design unclear/not reported | L1 - Done but unclear number of reviewers; L2 - Done but unclear number of reviewers | DA - Done but unclear number of reviewers; QA - Not reported            | Narrative/descriptive summary only |
